# Supplementary material for: Efficient chromatin accessibility mapping in situ by nucleosome-tethered tagmentation
Source: eLife. 2020 Nov 16;9:e63274. doi: 10.7554/eLife.63274 (PMC7721439; doi:10.7554/eLife.63274)
Supplement: Supplementary file 1. [file elife-63274-supp1.xlsx]

## Sheet: Datasets_by_figure
Number	Figure	Panel/Track	Sample	Illumina Sample Name	Short Name	Description	Source name	Characteristics	Organism	Extraction protocol	Library source	Library protocol
1	1C		SH_Hs_27m3_65k_0321	SH_Hs_27m3_65k_0321	K562_K27me3_60k_home	CUT&Tag for K27me3 in 60,000 K562 cells at home	CUT&TAG	antibody:H3K27me3 Cell Signaling Technology cat# 9733; cell type:K562 human immortalised myelogenous leukemia cell line	Homo sapiens	CnTathome_Protocols_io.pdf	genomic DNA	N/A
2	1C		SH_Hs_27m3_65k_0311	SH_Hs_27m3_65k_0311	K562_K27me3_60k_lab	CUT&Tag for K27me3 in 60,000 K562 cells in lab	CUT&TAG	antibody:H3K27me3 Cell Signaling Technology cat# 9733; cell type:K562 human immortalised myelogenous leukemia cell line	Homo sapiens	CnTathome_Protocols_io.pdf	genomic DNA	N/A
3	1C		SH_Hs_27m3_20k_0321	SH_Hs_27m3_20k_0321	K562_K27me3_20k_home	CUT&Tag for K27me3 in 20,000 K562 cells at home	CUT&TAG	antibody:H3K27me3 Cell Signaling Technology cat# 9733; cell type:K562 human immortalised myelogenous leukemia cell line	Homo sapiens	CnTathome_Protocols_io.pdf	genomic DNA	N/A
4	1C		SH_Hs_27m3_20k_0311	SH_Hs_27m3_20k_0311	K562_K27me3_20k_lab	CUT&Tag for K27me3 in 20,000 K562 cells in lab	CUT&TAG	antibody:H3K27me3 Cell Signaling Technology cat# 9733; cell type:K562 human immortalised myelogenous leukemia cell line	Homo sapiens	CnTathome_Protocols_io.pdf	genomic DNA	N/A
5	1C		SH_Hs_27m3_6500_0321	SH_Hs_27m3_6500_0321	K562_K27me3_6k_home	CUT&Tag for K27me3 in 6,000 K562 cells at home	CUT&TAG	antibody:H3K27me3 Cell Signaling Technology cat# 9733; cell type:K562 human immortalised myelogenous leukemia cell line	Homo sapiens	CnTathome_Protocols_io.pdf	genomic DNA	N/A
6	1C		SH_Hs_27m3_6500_0311	SH_Hs_27m3_6500_0311	K562_K27me3_6k_lab	CUT&Tag for K27me3 in 6,000 K562 cells in lab	CUT&TAG	antibody:H3K27me3 Cell Signaling Technology cat# 9733; cell type:K562 human immortalised myelogenous leukemia cell line	Homo sapiens	CnTathome_Protocols_io.pdf	genomic DNA	N/A
7	1C		SH_Hs_27m3_2000_0321	SH_Hs_27m3_2000_0321	K562_K27me3_2k_home	CUT&Tag for K27me3 in 2,000 K562 cells at home	CUT&TAG	antibody:H3K27me3 Cell Signaling Technology cat# 9733; cell type:K562 human immortalised myelogenous leukemia cell line	Homo sapiens	CnTathome_Protocols_io.pdf	genomic DNA	N/A
8	1C		SH_Hs_27m3_2000_0311	SH_Hs_27m3_2000_0311	K562_K27me3_2k_lab	CUT&Tag for K27me3 in 2,000 K562 cells in lab	CUT&TAG	antibody:H3K27me3 Cell Signaling Technology cat# 9733; cell type:K562 human immortalised myelogenous leukemia cell line	Homo sapiens	CnTathome_Protocols_io.pdf	genomic DNA	N/A
9	1C		SH_Hs_27m3_650_0321	SH_Hs_27m3_650_0321	K562_K27me3_600_home	CUT&Tag for K27me3 in 600 K562 cells at home	CUT&TAG	antibody:H3K27me3 Cell Signaling Technology cat# 9733; cell type:K562 human immortalised myelogenous leukemia cell line	Homo sapiens	CnTathome_Protocols_io.pdf	genomic DNA	N/A
10	1C		SH_Hs_27m3_650_0311	SH_Hs_27m3_650_0311	K562_K27me3_600_lab	CUT&Tag for K27me3 in 600 K562 cells in lab	CUT&TAG	antibody:H3K27me3 Cell Signaling Technology cat# 9733; cell type:K562 human immortalised myelogenous leukemia cell line	Homo sapiens	CnTathome_Protocols_io.pdf	genomic DNA	N/A
11	1C		SH_Hs_27m3_200_0321	SH_Hs_27m3_200_0321	K562_K27me3_200_home	CUT&Tag for K27me3 in 200 K562 cells at home	CUT&TAG	antibody:H3K27me3 Cell Signaling Technology cat# 9733; cell type:K562 human immortalised myelogenous leukemia cell line	Homo sapiens	CnTathome_Protocols_io.pdf	genomic DNA	N/A
12	1C		SH_Hs_27m3_200_0311	SH_Hs_27m3_200_0311	K562_K27me3_200_lab	CUT&Tag for K27me3 in 200 K562 cells in lab	CUT&TAG	antibody:H3K27me3 Cell Signaling Technology cat# 9733; cell type:K562 human immortalised myelogenous leukemia cell line	Homo sapiens	CnTathome_Protocols_io.pdf	genomic DNA	N/A
13	1C		SH_Hs_27m3_65_0321	SH_Hs_27m3_65_0321	K562_K27me3_60_home	CUT&Tag for K27me3 in 60 K562 cells at home	CUT&TAG	antibody:H3K27me3 Cell Signaling Technology cat# 9733; cell type:K562 human immortalised myelogenous leukemia cell line	Homo sapiens	CnTathome_Protocols_io.pdf	genomic DNA	N/A
14	1C		SH_Hs_27m3_65_0311	SH_Hs_27m3_65_0311	K562_K27me3_60_lab	CUT&Tag for K27me3 in 60 K562 cells in lab	CUT&TAG	antibody:H3K27me3 Cell Signaling Technology cat# 9733; cell type:K562 human immortalised myelogenous leukemia cell line	Homo sapiens	CnTathome_Protocols_io.pdf	genomic DNA	N/A
15	1D		SH_Hs_K4m3_65k_0321	SH_Hs_K4m3_65k_0321	K562_H3K4me3_60k_home	CUT&Tag for K4me3 in 60,000 K562 cells at home	CUT&TAG	antibody:H3K4me3 Active Motif cat# 39159 lot# 22118006; cell type:K562 human immortalised myelogenous leukemia cell line	Homo sapiens	CnTathome_Protocols_io.pdf	genomic DNA	N/A
16	1D		SH_Hs_K4m3_65k_0311	SH_Hs_K4m3_65k_0311	K562_H3K4me3_60k_lab	CUT&Tag for K4me3 in 60,000 K562 cells in lab	CUT&TAG	antibody:H3K4me3 Active Motif cat# 39159 lot# 22118006; cell type:K562 human immortalised myelogenous leukemia cell line	Homo sapiens	CnTathome_Protocols_io.pdf	genomic DNA	N/A
17	1D		SH_Hs_K4m3_20k_0321	SH_Hs_K4m3_20k_0321	K562_H3K4me3_20k_home	CUT&Tag for K4me3 in 20,000 K562 cells at home	CUT&TAG	antibody:H3K4me3 Active Motif cat# 39159 lot# 22118006; cell type:K562 human immortalised myelogenous leukemia cell line	Homo sapiens	CnTathome_Protocols_io.pdf	genomic DNA	N/A
18	1D		SH_Hs_K4me3_20k_0311	SH_Hs_K4me3_20k_0311	K562_H3K4me3_20k_lab	CUT&Tag for K4me3 in 20,000 K562 cells in lab	CUT&TAG	antibody:H3K4me3 Active Motif cat# 39159 lot# 22118006; cell type:K562 human immortalised myelogenous leukemia cell line	Homo sapiens	CnTathome_Protocols_io.pdf	genomic DNA	N/A
19	1D		SH_Hs_K4m3_6500_0321	SH_Hs_K4m3_6500_0321	K562_H3K4me3_6k_home	CUT&Tag for K4me3 in 6,000 K562 cells at home	CUT&TAG	antibody:H3K4me3 Active Motif cat# 39159 lot# 22118006; cell type:K562 human immortalised myelogenous leukemia cell line	Homo sapiens	CnTathome_Protocols_io.pdf	genomic DNA	N/A
20	1D		SH_Hs_K4m3_6500_0311	SH_Hs_K4m3_6500_0311	K562_H3K4me3_6k_lab	CUT&Tag for K4me3 in 6,000 K562 cells in lab	CUT&TAG	antibody:H3K4me3 Active Motif cat# 39159 lot# 22118006; cell type:K562 human immortalised myelogenous leukemia cell line	Homo sapiens	CnTathome_Protocols_io.pdf	genomic DNA	N/A
21	1D		SH_Hs_K4m3_2000_0321	SH_Hs_K4m3_2000_0321	K562_H3K4me3_2k_home	CUT&Tag for K4me3 in 2,000 K562 cells at home	CUT&TAG	antibody:H3K4me3 Active Motif cat# 39159 lot# 22118006; cell type:K562 human immortalised myelogenous leukemia cell line	Homo sapiens	CnTathome_Protocols_io.pdf	genomic DNA	N/A
22	1D		SH_Hs_K4m3_2000_0311	SH_Hs_K4m3_2000_0311	K562_H3K4me3_2k_lab	CUT&Tag for K4me3 in 2,000 K562 cells in lab	CUT&TAG	antibody:H3K4me3 Active Motif cat# 39159 lot# 22118006; cell type:K562 human immortalised myelogenous leukemia cell line	Homo sapiens	CnTathome_Protocols_io.pdf	genomic DNA	N/A
23	1D		SH_Hs_K4m3_650_0321	SH_Hs_K4m3_650_0321	K562_H3K4me3_600_home	CUT&Tag for K4me3 in 600 K562 cells at home	CUT&TAG	antibody:H3K4me3 Active Motif cat# 39159 lot# 22118006; cell type:K562 human immortalised myelogenous leukemia cell line	Homo sapiens	CnTathome_Protocols_io.pdf	genomic DNA	N/A
24	1D		SH_Hs_K4m3_650_0311	SH_Hs_K4m3_650_0311	K562_H3K4me3_600_lab	CUT&Tag for K4me3 in 600 K562 cells in lab	CUT&TAG	antibody:H3K4me3 Active Motif cat# 39159 lot# 22118006; cell type:K562 human immortalised myelogenous leukemia cell line	Homo sapiens	CnTathome_Protocols_io.pdf	genomic DNA	N/A
25	1D		SH_Hs_K4m3_200_0321	SH_Hs_K4m3_200_0321	K562_H3K4me3_200_home	CUT&Tag for K4me3 in 200 K562 cells at home	CUT&TAG	antibody:H3K4me3 Active Motif cat# 39159 lot# 22118006; cell type:K562 human immortalised myelogenous leukemia cell line	Homo sapiens	CnTathome_Protocols_io.pdf	genomic DNA	N/A
26	1D		SH_Hs_K4m3_200_0311	SH_Hs_K4m3_200_0311	K562_H3K4me3_200_lab	CUT&Tag for K4me3 in 200 K562 cells in lab	CUT&TAG	antibody:H3K4me3 Active Motif cat# 39159 lot# 22118006; cell type:K562 human immortalised myelogenous leukemia cell line	Homo sapiens	CnTathome_Protocols_io.pdf	genomic DNA	N/A
27	1D		SH_Hs_K4m3_65_0321	SH_Hs_K4m3_65_0321	K562_H3K4me3_60_home	CUT&Tag for K4me3 in 60 K562 cells at home	CUT&TAG	antibody:H3K4me3 Active Motif cat# 39159 lot# 22118006; cell type:K562 human immortalised myelogenous leukemia cell line	Homo sapiens	CnTathome_Protocols_io.pdf	genomic DNA	N/A
28	1D		SH_Hs_K4m3_65_0311	SH_Hs_K4m3_65_0311	K562_H3K4me3_60_lab	CUT&Tag for K4me3 in 60 K562 cells in lab	CUT&TAG	antibody:H3K4me3 Active Motif cat# 39159 lot# 22118006; cell type:K562 human immortalised myelogenous leukemia cell line	Homo sapiens	CnTathome_Protocols_io.pdf	genomic DNA	N/A
29	Fig 3A gel		SH_Hs_K4m2_37con5a_0726	SH_Hs_K4m2_37con5a_0726	K562_H3K4me2_rem5_1	CUTAC Removal for K4me2 5 min in K562 cells at home	CUT&TAG-direct	antibody:H3K4me2 Epicypher cat# 13-0027; cell type:K562 human immortalised myelogenous leukemia cell line	Homo sapiens	CUTnTag-direct_v2_Protocols.io.pdf	genomic DNA	N/A
30	Fig 3A gel		SH_Hs_K4m2_37con20a_0726	SH_Hs_K4m2_37con20a_0726	K562_H3K4me2_rem20_1	CUTAC Removal for K4me2 20 min in K562 cells at home	CUT&TAG-direct	antibody:H3K4me2 Epicypher cat# 13-0027; cell type:K562 human immortalised myelogenous leukemia cell line	Homo sapiens	CUTnTag-direct_v2_Protocols.io.pdf	genomic DNA	N/A
31	Fig 3A gel		SH_Hs_K4me2_37con60_0726	SH_Hs_K4me2_37con60_0726	K562_H3K4me2_rem60_1	CUTAC Removal for K4me2 5 min in K562 cells at home	CUT&TAG-direct	antibody:H3K4me2 Epicypher cat# 13-0027; cell type:K562 human immortalised myelogenous leukemia cell line	Homo sapiens	CUTnTag-direct_v2_Protocols.io.pdf	genomic DNA	N/A
32	Fig 3B-C	1	SH_Hs_LK5n_K4me3_0615	SH_Hs_LK5n_K4me3_0615	K562_H3K4me3_dil20	CUTAC Dilution for K4me3 60 min in K562 cells at home	CUT&TAG-direct	antibody:H3K4me3 Active Motif cat# 39159 lot# 22118006; cell type:K562 human immortalised myelogenous leukemia cell line	Homo sapiens	CUTnTag-direct_v2_Protocols.io.pdf	genomic DNA	N/A
33	Fig 3B-C	1	SH_Hs_K5n_K4m3_0615	SH_Hs_K5n_K4m3_0615	K562_H3K4me3_3	CUT&Tag for K4me3 in K562 cells at home	CUT&TAG-direct	antibody:H3K4me3 Active Motif cat# 39159 lot# 22118006; cell type:K562 human immortalised myelogenous leukemia cell line	Homo sapiens	CUTnTag-direct_v2_Protocols.io.pdf	genomic DNA	N/A
34	Fig 3B-C	2	SH_Hs_LK5n_K4me2E_0615	SH_Hs_LK5n_K4me2E_0615	K562_H3K4me2_dil20	CUTAC Dilution for K4me2 60 min in K562 cells at home	CUT&TAG-direct	antibody:H3K4me2 Epicypher cat# 13-0027; cell type:K562 human immortalised myelogenous leukemia cell line	Homo sapiens	CUTnTag-direct_v2_Protocols.io.pdf	genomic DNA	N/A
35	Fig 3B-C	2	SH_Hs_K5n_K4me2E_0615	SH_Hs_K5n_K4me2E_0615	K562_H3K4me2_CnT_8	CUT&Tag for K4me2 in K562 cells at home	CUT&TAG-direct	antibody:H3K4me2 Epicypher cat# 13-0027; cell type:K562 human immortalised myelogenous leukemia cell line	Homo sapiens	CUTnTag-direct_v2_Protocols.io.pdf	genomic DNA	N/A
36	Fig 3B-C	3	SH_Hs_LK5n_K4me1_0615	SH_Hs_LK5n_K4me1_0615	K562_H3K4me1_dil20	CUTAC Dilution for K4me1 60 min in K562 cells at home	CUT&TAG-direct	antibody:Epicypher 13-0026 lot 28344001; cell type:K562 human immortalised myelogenous leukemia cell line	Homo sapiens	CUTnTag-direct_v2_Protocols.io.pdf	genomic DNA	N/A
37	Fig 3B-C	3	SH_Hs_K5n_K4me1_0615	SH_Hs_K5n_K4me1_0615	K562_H3K4me1	CUT&Tag for K4me1 in K562 cells at home	CUT&TAG-direct	antibody:Epicypher 13-0026 lot 28344001; cell type:K562 human immortalised myelogenous leukemia cell line	Homo sapiens	CUTnTag-direct_v2_Protocols.io.pdf	genomic DNA	N/A
38	Fig 3D	1	SH_Hs_H_K4me2_0620	SH_Hs_H_K4me2_0620	K562_H3K4me2_CnT_1	CUT&Tag for K4me2 1:20 in K562 cells at home	CUT&TAG-direct	antibody:H3K4me2 Epicypher cat# 13-0027; cell type:K562 human immortalised myelogenous leukemia cell line	Homo sapiens	CUTnTag-direct_v2_Protocols.io.pdf	genomic DNA	N/A
39	Fig 3D	2	SH_Hs_K4m2_37con20a_0726	SH_Hs_K4m2_37con20a_0726	K562_H3K4me2_rem20_1	CUTAC Removal for K4me2 20 min in K562 cells at home	CUT&TAG-direct	antibody:H3K4me2 Epicypher cat# 13-0027; cell type:K562 human immortalised myelogenous leukemia cell line	Homo sapiens	CUTnTag-direct_v2_Protocols.io.pdf	genomic DNA	N/A
40	Fig 3D	3	SH_Hs_K4m2E_60_0809	SH_Hs_K4m2E_60_0809	K562_H3K4me2_p-w_60	CUTAC Post-wash for K4me2 60 min in K562 cells at home	CUT&TAG-direct	antibody:H3K4me2 Epicypher cat# 13-0027; cell type:K562 human immortalised myelogenous leukemia cell line	Homo sapiens	CUTnTag-direct_v2_Protocols.io.pdf	genomic DNA	N/A
41	Fig 3D	4	SH_Hs_K4m2Es2_60_0809	SH_Hs_K4m2Es2_60_0809	K562_H3K4me2_a-b_60	CUTAC 1% Add-back for K4me2 60 min in K562 cells at home	CUT&TAG-direct	antibody:H3K4me2 Epicypher cat# 13-0027; cell type:K562 human immortalised myelogenous leukemia cell line	Homo sapiens	CUTnTag-direct_v2_Protocols.io.pdf	genomic DNA	N/A
42	Fig. 3E	1	SH_Hs_10_K4me2_0620	SH_Hs_10_K4me2_0620	K562_H3K4me2_dil10	CUTAC Dilution for K4me2 pAG-Tn5 1:20 10 min in K562 cells at home	CUT&TAG-direct	antibody:H3K4me2 Epicypher cat# 13-0027; cell type:K562 human immortalised myelogenous leukemia cell line	Homo sapiens	CUTnTag-direct_v2_Protocols.io.pdf	genomic DNA	N/A
43	Fig. 3E	2	SH_Hs_K4m2_37hex20a_0726	SH_Hs_K4m2_37hex20a_0726	K562_H3K4me2_hex20_1	CUTAC Removal for K4me2 20 min hex in K562 cells at home	CUT&TAG-direct	antibody:H3K4me2 Epicypher cat# 13-0027; cell type:K562 human immortalised myelogenous leukemia cell line	Homo sapiens	CUTnTag-direct_v2_Protocols.io.pdf	genomic DNA	N/A
44	Fig. 3E	3	SH_Hs_K4m2_37dmf20_0726	SH_Hs_K4m2_37dmf20_0726	K562_H3K4me2_dmf20	CUTAC Removal for K4me2 20 min dmf in K562 cells at home	CUT&TAG-direct	antibody:H3K4me2 Epicypher cat# 13-0027; cell type:K562 human immortalised myelogenous leukemia cell line	Homo sapiens	CUTnTag-direct_v2_Protocols.io.pdf	genomic DNA	N/A
45	Fig. 3E	4	SH_Hs_K4m2_55hd60a_0726	SH_Hs_K4m2_55hd60a_0726	K562_H3K4me2_hd60_55deg	CUTAC Removal for K4me2 60 min hex + dmf 55deg in K562 cells at home	CUT&TAG-direct	antibody:H3K4me2 Epicypher cat# 13-0027; cell type:K562 human immortalised myelogenous leukemia cell line	Homo sapiens	CUTnTag-direct_v2_Protocols.io.pdf	genomic DNA	N/A
46	Fig. 3F	1	SH_Hs_K4m2_0726	SH_Hs_K4m2_0726	K562_H3K4me2_CnT_3	CUT&Tag for K4me2 in K562 cells at home	CUT&TAG-direct	antibody:H3K4me2 Epicypher cat# 13-0027; cell type:K562 human immortalised myelogenous leukemia cell line	Homo sapiens	CUTnTag-direct_v2_Protocols.io.pdf	genomic DNA	N/A
47	Fig. 3F	1	SH_Hs_K4m2_37con5a_0726	SH_Hs_K4m2_37con5a_0726	K562_H3K4me2_rem5_1	CUTAC Removal for K4me2 5 min in K562 cells at home	CUT&TAG-direct	antibody:H3K4me2 Epicypher cat# 13-0027; cell type:K562 human immortalised myelogenous leukemia cell line	Homo sapiens	CUTnTag-direct_v2_Protocols.io.pdf	genomic DNA	N/A
48	Fig. 3F	1	SH_Hs_K4m2_37con20a_0726	SH_Hs_K4m2_37con20a_0726	K562_H3K4me2_rem20_1	CUTAC Removal for K4me2 20 min in K562 cells at home	CUT&TAG-direct	antibody:H3K4me2 Epicypher cat# 13-0027; cell type:K562 human immortalised myelogenous leukemia cell line	Homo sapiens	CUTnTag-direct_v2_Protocols.io.pdf	genomic DNA	N/A
49	Fig. 3F	1	SH_Hs_K4m2_37con60a_0726	SH_Hs_K4m2_37con60a_0726	K562_H3K4me2_rem60_1	CUTAC Removal for K4me2 60 min in K562 cells at home	CUT&TAG-direct	antibody:H3K4me2 Epicypher cat# 13-0027; cell type:K562 human immortalised myelogenous leukemia cell line	Homo sapiens	CUTnTag-direct_v2_Protocols.io.pdf	genomic DNA	N/A
50	Fig. 3F	2	SH_Hs_K4m2_0726	SH_Hs_K4m2_0726	K562_H3K4me2_CnT_3	CUT&Tag for K4me2 in K562 cells at home	CUT&TAG-direct	antibody:H3K4me2 Epicypher cat# 13-0027; cell type:K562 human immortalised myelogenous leukemia cell line	Homo sapiens	CUTnTag-direct_v2_Protocols.io.pdf	genomic DNA	N/A
51	Fig. 3F	2	SH_Hs_K4m2_37dmf5a_0726	SH_Hs_K4m2_37dmf5a_0726	K562_H3K4me2_dmf5	CUTAC Removal for K4me2 5 min dmf in K562 cells at home	CUT&TAG-direct	antibody:H3K4me2 Epicypher cat# 13-0027; cell type:K562 human immortalised myelogenous leukemia cell line	Homo sapiens	CUTnTag-direct_v2_Protocols.io.pdf	genomic DNA	N/A
52	Fig. 3F	2	SH_Hs_K4m2_37dmf20_0726	SH_Hs_K4m2_37dmf20_0726	K562_H3K4me2_dmf20	CUTAC Removal for K4me2 20 min dmf in K562 cells at home	CUT&TAG-direct	antibody:H3K4me2 Epicypher cat# 13-0027; cell type:K562 human immortalised myelogenous leukemia cell line	Homo sapiens	CUTnTag-direct_v2_Protocols.io.pdf	genomic DNA	N/A
53	Fig. 3F	2	SH_Hs_K4m2_37dmf60_0726	SH_Hs_K4m2_37dmf60_0726	K562_H3K4me2_dmf60	CUTAC Removal for K4me2 60 min dmf in K562 cells at home	CUT&TAG-direct	antibody:H3K4me2 Epicypher cat# 13-0027; cell type:K562 human immortalised myelogenous leukemia cell line	Homo sapiens	CUTnTag-direct_v2_Protocols.io.pdf	genomic DNA	N/A
54	Fig. 3F	3	SH_Hs_K4m2_0726	SH_Hs_K4m2_0726	K562_H3K4me2_CnT_3	CUT&Tag for K4me2 in K562 cells at home	CUT&TAG-direct	antibody:H3K4me2 Epicypher cat# 13-0027; cell type:K562 human immortalised myelogenous leukemia cell line	Homo sapiens	CUTnTag-direct_v2_Protocols.io.pdf	genomic DNA	N/A
55	Fig. 3F	3	SH_Hs_K4m2_37dmf5a_0726	SH_Hs_K4m2_37dmf5a_0726	K562_H3K4me2_dmf5	CUTAC Removal for K4me2 5 min dmf in K562 cells at home	CUT&TAG-direct	antibody:H3K4me2 Epicypher cat# 13-0027; cell type:K562 human immortalised myelogenous leukemia cell line	Homo sapiens	CUTnTag-direct_v2_Protocols.io.pdf	genomic DNA	N/A
56	Fig. 3F	3	SH_Hs_K4m2_37dmf20_0726	SH_Hs_K4m2_37dmf20_0726	K562_H3K4me2_dmf20	CUTAC Removal for K4me2 20 min dmf in K562 cells at home	CUT&TAG-direct	antibody:H3K4me2 Epicypher cat# 13-0027; cell type:K562 human immortalised myelogenous leukemia cell line	Homo sapiens	CUTnTag-direct_v2_Protocols.io.pdf	genomic DNA	N/A
57	Fig. 3F	3	SH_Hs_K4m2_37dmf60_0726	SH_Hs_K4m2_37dmf60_0726	K562_H3K4me2_dmf60	CUTAC Removal for K4me2 60 min dmf in K562 cells at home	CUT&TAG-direct	antibody:H3K4me2 Epicypher cat# 13-0027; cell type:K562 human immortalised myelogenous leukemia cell line	Homo sapiens	CUTnTag-direct_v2_Protocols.io.pdf	genomic DNA	N/A
58	Fig. 3F	4	SH_Hs_K4m2_0726	SH_Hs_K4m2_0726	K562_H3K4me2_CnT_3	CUT&Tag for K4me2 in K562 cells at home	CUT&TAG-direct	antibody:H3K4me2 Epicypher cat# 13-0027; cell type:K562 human immortalised myelogenous leukemia cell line	Homo sapiens	CUTnTag-direct_v2_Protocols.io.pdf	genomic DNA	N/A
59	Fig. 3F	4	SH_Hs_K4m2_55hd5a_0726	SH_Hs_K4m2_55hd5a_0726	K562_H3K4me2_hd5_55deg	CUTAC Removal for K4me2 5 min hex dmf in K562 cells at home	CUT&TAG-direct	antibody:H3K4me2 Epicypher cat# 13-0027; cell type:K562 human immortalised myelogenous leukemia cell line	Homo sapiens	CUTnTag-direct_v2_Protocols.io.pdf	genomic DNA	N/A
60	Fig. 3F	4	SH_Hs_K4m2_55hd20a_0726	SH_Hs_K4m2_55hd20a_0726	K562_H3K4me2_hd20_55deg	CUTAC Removal for K4me2 20 min hex dmf in K562 cells at home	CUT&TAG-direct	antibody:H3K4me2 Epicypher cat# 13-0027; cell type:K562 human immortalised myelogenous leukemia cell line	Homo sapiens	CUTnTag-direct_v2_Protocols.io.pdf	genomic DNA	N/A
61	Fig. 3F	4	SH_Hs_K4m2_55hd60a_0726	SH_Hs_K4m2_55hd60a_0726	K562_H3K4me2_hd60_55deg	CUTAC Removal for K4me2 60 min hex + dmf 55deg in K562 cells at home	CUT&TAG-direct	antibody:H3K4me2 Epicypher cat# 13-0027; cell type:K562 human immortalised myelogenous leukemia cell line	Homo sapiens	CUTnTag-direct_v2_Protocols.io.pdf	genomic DNA	N/A
62	Fig. 3G	1,2	SH_Hs_K4m2_37hex20a_0726	SH_Hs_K4m2_37hex20a_0726	K562_H3K4me2_hex20_1	CUTAC Removal for K4me2 20 min hex in K562 cells at home	CUT&TAG-direct	antibody:H3K4me2 Epicypher cat# 13-0027; cell type:K562 human immortalised myelogenous leukemia cell line	Homo sapiens	CUTnTag-direct_v2_Protocols.io.pdf	genomic DNA	N/A
63	Fig. 3G	3,4	SH_Hs_K4m2_37dmf20_0726	SH_Hs_K4m2_37dmf20_0726	K562_H3K4me2_dmf20	CUTAC Removal for K4me2 20 min dmf in K562 cells at home	CUT&TAG-direct	antibody:H3K4me2 Epicypher cat# 13-0027; cell type:K562 human immortalised myelogenous leukemia cell line	Homo sapiens	CUTnTag-direct_v2_Protocols.io.pdf	genomic DNA	N/A
64	Fig. 4A peaks		SH_Hs_K4m2_0726	SH_Hs_K4m2_0726	K562_H3K4me2_CnT_3	CUT&Tag for K4me2 in K562 cells at home	CUT&TAG-direct	antibody:H3K4me2 Epicypher cat# 13-0027; cell type:K562 human immortalised myelogenous leukemia cell line	Homo sapiens	CUTnTag-direct_v2_Protocols.io.pdf	genomic DNA	N/A
65	Fig. 4B	1	SH_Hs_K4m2_0726	SH_Hs_K4m2_0726	K562_H3K4me2_CnT_3	CUT&Tag for K4me2 in K562 cells at home	CUT&TAG-direct	antibody:H3K4me2 Epicypher cat# 13-0027; cell type:K562 human immortalised myelogenous leukemia cell line	Homo sapiens	CUTnTag-direct_v2_Protocols.io.pdf	genomic DNA	N/A
66	Fig. 4B	2	SH_Hs_K4m2_37con20a_0726	SH_Hs_K4m2_37con20a_0726	K562_H3K4me2_rem20_1	CUTAC Removal for K4me2 20 min in K562 cells at home	CUT&TAG-direct	antibody:H3K4me2 Epicypher cat# 13-0027; cell type:K562 human immortalised myelogenous leukemia cell line	Homo sapiens	CUTnTag-direct_v2_Protocols.io.pdf	genomic DNA	N/A
67	Fig. 4C peaks		SH_Hs_K4m2_37con20a_0726	SH_Hs_K4m2_37con20a_0726	K562_H3K4me2_rem20_1	CUTAC Removal for K4me2 20 min in K562 cells at home	CUT&TAG-direct	antibody:H3K4me2 Epicypher cat# 13-0027; cell type:K562 human immortalised myelogenous leukemia cell line	Homo sapiens	CUTnTag-direct_v2_Protocols.io.pdf	genomic DNA	N/A
68	Fig. 4D peaks		SH_Hs_K4m3_K5_0802	SH_Hs_K4m3_K5_0802	K562_H3K4me3_1	CUT&Tag for K4me3 in K562 cells at home	CUT&TAG-direct	antibody:H3K4me3 Active Motif cat# 39159 lot# 22118006; cell type:K562 human immortalised myelogenous leukemia cell line	Homo sapiens	CUTnTag-direct_v2_Protocols.io.pdf	genomic DNA	N/A
69	Fig. 4E	1,3	SH_Hs_K4m2_37con20a_0726	SH_Hs_K4m2_37con20a_0726	K562_H3K4me2_rem20_1	CUTAC Removal for K4me2 20 min in K562 cells at home	CUT&TAG-direct	antibody:H3K4me2 Epicypher cat# 13-0027; cell type:K562 human immortalised myelogenous leukemia cell line	Homo sapiens	CUTnTag-direct_v2_Protocols.io.pdf	genomic DNA	N/A
70	Fig. 4E	2,4	SH_Hs_K4m2_0726	SH_Hs_K4m2_0726	K562_H3K4me2_CnT_3	CUT&Tag for K4me2 in K562 cells at home	CUT&TAG-direct	antibody:H3K4me2 Epicypher cat# 13-0027; cell type:K562 human immortalised myelogenous leukemia cell line	Homo sapiens	CUTnTag-direct_v2_Protocols.io.pdf	genomic DNA	N/A
71	Fig. 4F	1	SH_Hs_K4m2_37con5a_0726	SH_Hs_K4m2_37con5a_0726	K562_H3K4me2_rem5_1	CUTAC Removal for K4me2 5 min in K562 cells at home	CUT&TAG-direct	antibody:H3K4me2 Epicypher cat# 13-0027; cell type:K562 human immortalised myelogenous leukemia cell line	Homo sapiens	CUTnTag-direct_v2_Protocols.io.pdf	genomic DNA	N/A
72	Fig. 4F	2	SH_Hs_K4m2_37con60a_0726	SH_Hs_K4m2_37con60a_0726	K562_H3K4me2_rem60_1	CUTAC Removal for K4me2 60 min in K562 cells at home	CUT&TAG-direct	antibody:H3K4me2 Epicypher cat# 13-0027; cell type:K562 human immortalised myelogenous leukemia cell line	Homo sapiens	CUTnTag-direct_v2_Protocols.io.pdf	genomic DNA	N/A
73	Fig. 4F	3	SH_Hs_K4m2_37con20a_0726	SH_Hs_K4m2_37con20a_0726	K562_H3K4me2_rem20_1	CUTAC Removal for K4me2 20 min in K562 cells at home	CUT&TAG-direct	antibody:H3K4me2 Epicypher cat# 13-0027; cell type:K562 human immortalised myelogenous leukemia cell line	Homo sapiens	CUTnTag-direct_v2_Protocols.io.pdf	genomic DNA	N/A
74	Fig. 4F	4	SH_Hs_K4m2_37hex20a_0726	SH_Hs_K4m2_37hex20a_0726	K562_H3K4me2_hex20_1	CUTAC Removal for K4me2 20 min hex in K562 cells at home	CUT&TAG-direct	antibody:H3K4me2 Epicypher cat# 13-0027; cell type:K562 human immortalised myelogenous leukemia cell line	Homo sapiens	CUTnTag-direct_v2_Protocols.io.pdf	genomic DNA	N/A
75	Fig. 4F	5	SH_Hs_K4m2_37dmf20_0726	SH_Hs_K4m2_37dmf20_0726	K562_H3K4me2_dmf20	CUTAC Removal for K4me2 20 min dmf in K562 cells at home	CUT&TAG-direct	antibody:H3K4me2 Epicypher cat# 13-0027; cell type:K562 human immortalised myelogenous leukemia cell line	Homo sapiens	CUTnTag-direct_v2_Protocols.io.pdf	genomic DNA	N/A
76	Fig. 4F	6	SH_Hs_K4me3_con_1005	SH_Hs_K4me3_con_1005	K562_H3K4me3_p-w	CUTAC Post-wash for K4me3 20 min in K562 cells at home	CUT&TAG-direct	antibody:H3K4me3 Active Motif cat# 39159 lot# 22118006; cell type:K562 human immortalised myelogenous leukemia cell line	Homo sapiens	CUTnTag-direct_v2_Protocols.io.pdf	genomic DNA	N/A
77	Fig. 4F	7	SH_Hs_K4me3_hex1005	SH_Hs_K4me3_hex1005	K562_H3K4me3_hex_p-w	CUTAC Post-wash for K4me3 20 min hex in K562 cells at home	CUT&TAG-direct	antibody:H3K4me3 Active Motif cat# 39159 lot# 22118006; cell type:K562 human immortalised myelogenous leukemia cell line	Homo sapiens	CUTnTag-direct_v2_Protocols.io.pdf	genomic DNA	N/A
78	Fig. 4F	8	SH_Hs_K4me3_dmf1005	SH_Hs_K4me3_dmf1005	K562_H3K4me3_dmf_p-w	CUTAC Post-wash for K4me3 20 min dmf in K562 cells at home	CUT&TAG-direct	antibody:H3K4me3 Active Motif cat# 39159 lot# 22118006; cell type:K562 human immortalised myelogenous leukemia cell line	Homo sapiens	CUTnTag-direct_v2_Protocols.io.pdf	genomic DNA	N/A
79	Fig. 5A-B		SH_Hs_K4m2_0726	SH_Hs_K4m2_0726	K562_H3K4me2_CnT_3	CUT&Tag for K4me2 in K562 cells at home	CUT&TAG-direct	antibody:H3K4me2 Epicypher cat# 13-0027; cell type:K562 human immortalised myelogenous leukemia cell line	Homo sapiens	CUTnTag-direct_v2_Protocols.io.pdf	genomic DNA	N/A
80	Fig. 5A-B		SH_Hs_K4m2_37con5a_0726	SH_Hs_K4m2_37con5a_0726	K562_H3K4me2_rem5_1	CUTAC Removal for K4me2 5 min in K562 cells at home	CUT&TAG-direct	antibody:H3K4me2 Epicypher cat# 13-0027; cell type:K562 human immortalised myelogenous leukemia cell line	Homo sapiens	CUTnTag-direct_v2_Protocols.io.pdf	genomic DNA	N/A
81	Fig. 5A-B		SH_Hs_K4m2_37con20a_0726	SH_Hs_K4m2_37con20a_0726	K562_H3K4me2_rem20_1	CUTAC Removal for K4me2 20 min in K562 cells at home	CUT&TAG-direct	antibody:H3K4me2 Epicypher cat# 13-0027; cell type:K562 human immortalised myelogenous leukemia cell line	Homo sapiens	CUTnTag-direct_v2_Protocols.io.pdf	genomic DNA	N/A
82	Fig. 5A-B		SH_Hs_K4m2_37con60a_0726	SH_Hs_K4m2_37con60a_0726	K562_H3K4me2_rem60_1	CUTAC Removal for K4me2 5 min in K562 cells at home	CUT&TAG-direct	antibody:H3K4me2 Epicypher cat# 13-0027; cell type:K562 human immortalised myelogenous leukemia cell line	Homo sapiens	CUTnTag-direct_v2_Protocols.io.pdf	genomic DNA	N/A
83	Table 1	2	SH_Hs_H1K4m2E_1005	SH_Hs_H1_K4m2E_1005	H1_H3K4me2_p-w	CUT&Tag Post-wash for K4me2 60 min in H1 ES cells at home	CUT&TAG-direct	antibody:H3K4me2 Epicypher cat# 13-0027; cell type:H1 human embryonic stem cell line	Homo sapiens	CUTnTag-direct_v2_Protocols.io.pdf	genomic DNA	N/A
84	Table 1	3	SH_Hs_K4m2_0726	SH_Hs_K4m2_0726	K562_H3K4me2_CnT_3	CUT&Tag for K4me2 in K562 cells at home	CUT&TAG-direct	antibody:H3K4me2 Epicypher cat# 13-0027; cell type:K562 human immortalised myelogenous leukemia cell line	Homo sapiens	CUTnTag-direct_v2_Protocols.io.pdf	genomic DNA	N/A
85	Table 1	4	SH_Hs_H1K4m2E_con_1005	SH_Hs_H1_K4m2Econ_1005	H1_H3K4me2_con_p-w	CUTAC Post-wash for K4me2 in H1 ES cells at home	CUT&TAG-direct	antibody:H3K4me2 Epicypher cat# 13-0027; cell type:H1 human embryonic stem cell line	Homo sapiens	CUTnTag-direct_v2_Protocols.io.pdf	genomic DNA	N/A
86	Fig. 6A	1	SH_Hs_K4m2_0727	SH_Hs_K4m2_0727	K562_H3K4me2_CnT_4	CUT&Tag for K4me2 in K562 cells at home	CUT&TAG-direct	antibody:H3K4me2 Epicypher cat# 13-0027; cell type:K562 human immortalised myelogenous leukemia cell line	Homo sapiens	CUTnTag-direct_v2_Protocols.io.pdf	genomic DNA	N/A
87	Fig. 6A	2	SH_Hs_K4m2_37con5b_0726	SH_Hs_K4m2_37con5b_0726	K562_H3K4me2_rem5_2	CUTAC Removal for K4me2 5 min in K562 cells at home	CUT&TAG-direct	antibody:H3K4me2 Epicypher cat# 13-0027; cell type:K562 human immortalised myelogenous leukemia cell line	Homo sapiens	CUTnTag-direct_v2_Protocols.io.pdf	genomic DNA	N/A
88	Fig. 6B peaks	1	SH_Hs_K4m2_0727	SH_Hs_K4m2_0727	K562_H3K4me2_CnT_4	CUT&Tag for K4me2 in K562 cells at home	CUT&TAG-direct	antibody:H3K4me2 Epicypher cat# 13-0027; cell type:K562 human immortalised myelogenous leukemia cell line	Homo sapiens	CUTnTag-direct_v2_Protocols.io.pdf	genomic DNA	N/A
89	Fig. 6B peaks	2	SH_Hs_K4m2_37con5b_0726	SH_Hs_K4m2_37con5b_0726	K562_H3K4me2_rem5_2	CUTAC Removal for K4me2 5 min in K562 cells at home	CUT&TAG-direct	antibody:H3K4me2 Epicypher cat# 13-0027; cell type:K562 human immortalised myelogenous leukemia cell line	Homo sapiens	CUTnTag-direct_v2_Protocols.io.pdf	genomic DNA	N/A
90	Fig. 6C peaks	1	SH_Hs_K4m2_0727	SH_Hs_K4m2_0727	K562_H3K4me2_CnT_4	CUT&Tag for K4me2 in K562 cells at home	CUT&TAG-direct	antibody:H3K4me2 Epicypher cat# 13-0027; cell type:K562 human immortalised myelogenous leukemia cell line	Homo sapiens	CUTnTag-direct_v2_Protocols.io.pdf	genomic DNA	N/A
91	Fig. 6C peaks	2	SH_Hs_K4m2_37con5b_0726	SH_Hs_K4m2_37con5b_0726	K562_H3K4me2_rem5_2	CUTAC Removal for K4me2 5 min in K562 cells at home	CUT&TAG-direct	antibody:H3K4me2 Epicypher cat# 13-0027; cell type:K562 human immortalised myelogenous leukemia cell line	Homo sapiens	CUTnTag-direct_v2_Protocols.io.pdf	genomic DNA	N/A
92	Fig. 3–figsup1A-B	1	SH_Hs_H_K4me2_0620	SH_Hs_H_K4me2_0620	K562_H3K4me2_CnT_1	CUT&Tag for K4me2 1:20 in K562 cells at home	CUT&TAG-direct	antibody:H3K4me2 Epicypher cat# 13-0027; cell type:K562 human immortalised myelogenous leukemia cell line	Homo sapiens	CUTnTag-direct_v2_Protocols.io.pdf	genomic DNA	N/A
93	Fig. 3–figsup1A-B	2	SH_Hs_10_K4me2_0620	SH_Hs_10_K4me2_0620	K562_H3K4me2_dil10	CUTAC Dilution for K4me2 pAG-Tn5 1:20 10 min in K562 cells at home	CUT&TAG-direct	antibody:H3K4me2 Epicypher cat# 13-0027; cell type:K562 human immortalised myelogenous leukemia cell line	Homo sapiens	CUTnTag-direct_v2_Protocols.io.pdf	genomic DNA	N/A
94	Fig. 3–figsup1A-B	3	SH_Hs_30_K4me2_0620	SH_Hs_30_K4me2_0620	K562_H3K4me2_dil30	CUTAC Dilution for K4me2 pAG-Tn5 1:20 30 min in K562 cells at home	CUT&TAG-direct	antibody:H3K4me2 Epicypher cat# 13-0027; cell type:K562 human immortalised myelogenous leukemia cell line	Homo sapiens	CUTnTag-direct_v2_Protocols.io.pdf	genomic DNA	N/A
95	Fig. 3–figsup1A-B	4	SH_Hs_60_K4me2_0620	SH_Hs_60_K4me2_0620	K562_H3K4me2_dil60_2	CUTAC Dilution for K4me2 pAG-Tn5 1:20 60 min in K562 cells at home	CUT&TAG-direct	antibody:H3K4me2 Epicypher cat# 13-0027; cell type:K562 human immortalised myelogenous leukemia cell line	Homo sapiens	CUTnTag-direct_v2_Protocols.io.pdf	genomic DNA	N/A
96	Fig. 3–figsup1A-B	5	SH_Hs_HL_K4me2_0620	SH_Hs_HL_K4me2_0620	K562_H3K4me2_CnT_2	CUT&Tag for K4me2 in K562 1:60 in K562 cells at home	CUT&TAG-direct	antibody:H3K4me2 Epicypher cat# 13-0027; cell type:K562 human immortalised myelogenous leukemia cell line	Homo sapiens	CUTnTag-direct_v2_Protocols.io.pdf	genomic DNA	N/A
97	Fig. 3–figsup1A-B	6	SH_Hs_10L_K4me2_0620	SH_Hs_10L_K4me2_0620	K562_H3K4me2_dil10L	CUTAC Dilution for K4me2 pAG-Tn5 1:60 10 min in K562 cells at home	CUT&TAG-direct	antibody:H3K4me2 Epicypher cat# 13-0027; cell type:K562 human immortalised myelogenous leukemia cell line	Homo sapiens	CUTnTag-direct_v2_Protocols.io.pdf	genomic DNA	N/A
98	Fig. 3–figsup1A-B	7	SH_Hs_30L_K4me2_0620	SH_Hs_30L_K4me2_0620	K562_H3K4me2_dil30L	CUTAC Dilution for K4me2 pAG-Tn5 1:60 30 min in K562 cells at home	CUT&TAG-direct	antibody:H3K4me2 Epicypher cat# 13-0027; cell type:K562 human immortalised myelogenous leukemia cell line	Homo sapiens	CUTnTag-direct_v2_Protocols.io.pdf	genomic DNA	N/A
99	Fig. 3–figsup1A-B	8	SH_Hs_60L_K4me2_0620	SH_Hs_60L_K4me2_0620	K562_H3K4me2_dil60L	CUTAC Dilution for K4me2 pAG-Tn5 1:60 60 min in K562 cells at home	CUT&TAG-direct	antibody:H3K4me2 Epicypher cat# 13-0027; cell type:K562 human immortalised myelogenous leukemia cell line	Homo sapiens	CUTnTag-direct_v2_Protocols.io.pdf	genomic DNA	N/A
100	Fig. 3–figsup1C-D	1	SH_Hs_K4m2_0726	SH_Hs_K4m2_0726	K562_H3K4me2_CnT_3	CUT&Tag for K4me2 in K562 cells at home	CUT&TAG-direct	antibody:H3K4me2 Epicypher cat# 13-0027; cell type:K562 human immortalised myelogenous leukemia cell line	Homo sapiens	CUTnTag-direct_v2_Protocols.io.pdf	genomic DNA	N/A
101	Fig. 3–figsup1C-D	2	SH_Hs_K4m2_37con20a_0726	SH_Hs_K4m2_37con20a_0726	K562_H3K4me2_rem20_1	CUTAC Removal for K4me2 20 min in K562 cells at home	CUT&TAG-direct	antibody:H3K4me2 Epicypher cat# 13-0027; cell type:K562 human immortalised myelogenous leukemia cell line	Homo sapiens	CUTnTag-direct_v2_Protocols.io.pdf	genomic DNA	N/A
102	Fig. 3–figsup1C-D	3	SH_Hs_K4m2_37hex5b_0726	SH_Hs_K4m2_37hex5b_0726	K562_H3K4me2_hex5	CUTAC Removal for K4me2 5 min in K562 cells at home	CUT&TAG-direct	antibody:H3K4me2 Epicypher cat# 13-0027; cell type:K562 human immortalised myelogenous leukemia cell line	Homo sapiens	CUTnTag-direct_v2_Protocols.io.pdf	genomic DNA	N/A
103	Fig. 3–figsup1C-D	4	SH_Hs_K4m2_37hex20b_0726	SH_Hs_K4m2_37hex20b_0726	K562_H3K4me2_hex20_2	CUTAC Removal for K4me2 5 min hex in K562 cells at home	CUT&TAG-direct	antibody:H3K4me2 Epicypher cat# 13-0027; cell type:K562 human immortalised myelogenous leukemia cell line	Homo sapiens	CUTnTag-direct_v2_Protocols.io.pdf	genomic DNA	N/A
104	Fig. 3–figsup1C-D	5	SH_Hs_K4m2_37hex60a_0726	SH_Hs_K4m2_37hex60a_0726	K562_H3K4me2_he60	CUTAC Removal for K4me2 20 min hex in K562 cells at home	CUT&TAG-direct	antibody:H3K4me2 Epicypher cat# 13-0027; cell type:K562 human immortalised myelogenous leukemia cell line	Homo sapiens	CUTnTag-direct_v2_Protocols.io.pdf	genomic DNA	N/A
105	Fig. 3–figsup1C-D	6	SH_Hs_K4m2_37dmf20_0726	SH_Hs_K4m2_37dmf20_0726	K562_H3K4me2_dmf20	CUTAC Removal for K4me2 60 min dmf in K562 cells at home	CUT&TAG-direct	antibody:H3K4me2 Epicypher cat# 13-0027; cell type:K562 human immortalised myelogenous leukemia cell line	Homo sapiens	CUTnTag-direct_v2_Protocols.io.pdf	genomic DNA	N/A
106	Fig. 3–figsup1C-D	7	SH_Hs_K4m2_55hd60a_0726	SH_Hs_K4m2_55hd60a_0726	K562_H3K4me2_hd20_55deg	CUTAC Removal for K4me2 5 min dmf in K562 cells at home	CUT&TAG-direct	antibody:H3K4me2 Epicypher cat# 13-0027; cell type:K562 human immortalised myelogenous leukemia cell line	Homo sapiens	CUTnTag-direct_v2_Protocols.io.pdf	genomic DNA	N/A
107	Fig. 3–figsup1E-F	1	SH_Hs_K4me2E_1004	SH_Hs_K4me2E_1004	K562_H3K4me2_p-w_1	CUTAC Post-wash for K4me2 in K562 cells at home	CUT&TAG-direct	antibody:H3K4me2 Epicypher cat# 13-0027; cell type:K562 human immortalised myelogenous leukemia cell line	Homo sapiens	CUTnTag-direct_v2_Protocols.io.pdf	genomic DNA	N/A
108	Fig. 3–figsup1E-F	2	SH_Hs_K4me2E_con_1004	SH_Hs_K4me2E_con_1004	K562_H3K4me2_con_p-w_1	CUTAC Post-wash for K4me2 20 min in K562cells at home	CUT&TAG-direct	antibody:H3K4me2 Epicypher cat# 13-0027; cell type:K562 human immortalised myelogenous leukemia cell line	Homo sapiens	CUTnTag-direct_v2_Protocols.io.pdf	genomic DNA	N/A
109	Fig. 3–figsup1E-F	3	SH_Hs_K4me2E_RT_1004	SH_Hs_K4me2E_RT_1004	K562_H3K4me2_RT_p-w	CUTAC Post-wash for K4me2 20 min 22deg in K562cells at home	CUT&TAG-direct	antibody:H3K4me2 Epicypher cat# 13-0027; cell type:K562 human immortalised myelogenous leukemia cell line	Homo sapiens	CUTnTag-direct_v2_Protocols.io.pdf	genomic DNA	N/A
110	Fig. 3–figsup1E-F	4	SH_Hs_K4me2E_hex_1004	SH_Hs_K4me2E_hex_1004	K562_H3K4me2_hex_p-w	CUTAC Post-wash for K4me2 20 min hex in K562 cells at home	CUT&TAG-direct	antibody:H3K4me2 Epicypher cat# 13-0027; cell type:K562 human immortalised myelogenous leukemia cell line	Homo sapiens	CUTnTag-direct_v2_Protocols.io.pdf	genomic DNA	N/A
111	Fig. 3–figsup1E-F	5	SH_Hs_K4me2E_hexRT_1004	SH_Hs_K4me2E_hexRT_1004	K562_H3K4me2_hexRT_p-w	CUTAC Post-wash for K4me2 20 min hex 22deg in K562 cells at home	CUT&TAG-direct	antibody:H3K4me2 Epicypher cat# 13-0027; cell type:K562 human immortalised myelogenous leukemia cell line	Homo sapiens	CUTnTag-direct_v2_Protocols.io.pdf	genomic DNA	N/A
112	Fig. 3–figsup1E-F	6	SH_Hs_K4me2E_dmf_1004	SH_Hs_K4me2E_dmf_1004	K562_H3K4me2_dmf_p-w	CUTAC Post-wash for K4me2 20 min dmf in K562 cells at home	CUT&TAG-direct	antibody:H3K4me2 Epicypher cat# 13-0027; cell type:K562 human immortalised myelogenous leukemia cell line	Homo sapiens	CUTnTag-direct_v2_Protocols.io.pdf	genomic DNA	N/A
113	Fig. 3–figsup1E-F	7	SH_Hs_K4me2M_1004	SH_Hs_K4me2M_1004	K562_H3K4me2_p-w_2	CUTAC Post-wash for K4me2 in K562 cells at home	CUT&TAG-direct	antibody:H3K4me2 Epicypher cat# 13-0027; cell type:K562 human immortalised myelogenous leukemia cell line	Homo sapiens	CUTnTag-direct_v2_Protocols.io.pdf	genomic DNA	N/A
114	Fig. 3–figsup1E-F	8	SH_Hs_K4me2M_con_1004	SH_Hs_K4me2M_con_1004	K562_H3K4me2_con_p-w_2	CUTAC Post-wash for K4me2 20 min in K562 cells at home	CUT&TAG-direct	antibody:H3K4me2 Epicypher cat# 13-0027; cell type:K562 human immortalised myelogenous leukemia cell line	Homo sapiens	CUTnTag-direct_v2_Protocols.io.pdf	genomic DNA	N/A
115	Fig. 3–figsup2	3	SH_Hs_K4m2M_15kA_0803	SH_Hs_K4m2M_15kA_0803	K562_H3K4m2M_rem20_2	CUTAC Removal for K4me2 20 min in K562 cells at home	CUT&TAG-direct	antibody:H3K4me2 Millipore cat# 07-030 lot 3229364; cell type:K562 human immortalised myelogenous leukemia cell line	Homo sapiens	CUTnTag-direct_v2_Protocols.io.pdf	genomic DNA	N/A
116	Fig. 3–figsup2	4	SH_Hs_K4m2M_15k_0803	SH_Hs_K4m2M_15k_0803	K562_H3K4m2M_rem20_1	CUT&Tag for K4me2 in K562 cells at home	CUT&TAG-direct	antibody:H3K4me2 Millipore cat# 07-030 lot 3229364; cell type:K562 human immortalised myelogenous leukemia cell line	Homo sapiens	CUTnTag-direct_v2_Protocols.io.pdf	genomic DNA	N/A
117	Fig. 3–figsup2	5	SH_Hs_K4m2E_K5A_0802	SH_Hs_K4m2E_K5A_0802	K562_H3K4me2_CnT_6	CUTAC Removal for K4me2 20 min in K562 cells at home	CUT&TAG-direct	antibody:H3K4me2 Epicypher cat# 13-0027; cell type:K562 human immortalised myelogenous leukemia cell line	Homo sapiens	CUTnTag-direct_v2_Protocols.io.pdf	genomic DNA	N/A
118	Fig. 3–figsup2	6	SH_Hs_K4m2E_K5_0802	SH_Hs_K4m2E_K5_0802	K562_H3K4me2_CnT_5	CUT&Tag for K4me2 in K562 cells at home	CUT&TAG-direct	antibody:H3K4me2 Epicypher cat# 13-0027; cell type:K562 human immortalised myelogenous leukemia cell line	Homo sapiens	CUTnTag-direct_v2_Protocols.io.pdf	genomic DNA	N/A
119	Fig. 3–figsup2	7	SH_Hs_K4m3_K5A_0802	SH_Hs_K4m3_K5A_0802	K562_H3K4me3_2	CUTAC Removal for K4me3 20 min in K562 cells at home	CUT&TAG-direct	antibody:H3K4me3 Active Motif cat# 39159 lot# 22118006; cell type:K562 human immortalised myelogenous leukemia cell line	Homo sapiens	CUTnTag-direct_v2_Protocols.io.pdf	genomic DNA	N/A
120	Fig. 3–figsup2	8	SH_Hs_K4m3_K5_0802	SH_Hs_K4m3_K5_0802	K562_H3K4me3_1	CUT&Tag for K4me3 in K562 cells at home	CUT&TAG-direct	antibody:H3K4me3 Active Motif cat# 39159 lot# 22118006; cell type:K562 human immortalised myelogenous leukemia cell line	Homo sapiens	CUTnTag-direct_v2_Protocols.io.pdf	genomic DNA	N/A
121	Fig. 3–figsup2	9	SH_Hs_K4m1_10_0801	SH_Hs_K4m1_10_0801	K562_H3K4me1_rem10	CUTAC Removal for K4me1 20 min in K562 cells at home	CUT&TAG-direct	antibody:Epicypher 13-0040; cell type:K562 human immortalised myelogenous leukemia cell line	Homo sapiens	CUTnTag-direct_v2_Protocols.io.pdf	genomic DNA	N/A
122	Fig. 3–figsup2	10	SH_Hs_K4m1_0801	SH_Hs_K4m1_0801	K562_H3K4me1	CUT&Tag for K4me1 in K562 cells at home	CUT&TAG-direct	antibody:Epicypher 13-0040; cell type:K562 human immortalised myelogenous leukemia cell line	Homo sapiens	CUTnTag-direct_v2_Protocols.io.pdf	genomic DNA	N/A
123	Fig. 3–figsup2	11	SH_Hs_K27ac_10_0801	SH_Hs_K27ac_10_0801	K562_H3K27ac_rem10	CUTAC Removal for K27ac 20 min in K562 cells at home	CUT&TAG-direct	antibody:H3K27ac Millipore MABE647 lot RM172; cell type:K562 human immortalised myelogenous leukemia cell line	Homo sapiens	CUTnTag-direct_v2_Protocols.io.pdf	genomic DNA	N/A
124	Fig. 3–figsup2	12	SH_Hs_K27ac_0801	SH_Hs_K27ac_0801	K562_H3K27ac	CUT&Tag for K27ac in K562 cells at home	CUT&TAG-direct	antibody:H3K27ac Millipore MABE647 lot RM172; cell type:K562 human immortalised myelogenous leukemia cell line	Homo sapiens	CUTnTag-direct_v2_Protocols.io.pdf	genomic DNA	N/A
125	Fig. 3–figsup2	13	SH_Hs_H2AZ_10_0801	SH_Hs_H2AZ_10_0801	K562_H2AZ_rem10	CUTAC Removal for H2AZ 10 min in K562 cells at home	CUT&TAG-direct	antibody:H2AZ Active Motif cat. #39113; cell type:K562 human immortalised myelogenous leukemia cell line	Homo sapiens	CUTnTag-direct_v2_Protocols.io.pdf	genomic DNA	N/A
126	Fig. 3–figsup2	14	SH_Hs_H2AZ_0801	SH_Hs_H2AZ_0801	K562_H2AZ	CUT&Tag for H2AZ in K562 cells at home	CUT&TAG-direct	antibody:H2AZ Active Motif cat. #39113; cell type:K562 human immortalised myelogenous leukemia cell line	Homo sapiens	CUTnTag-direct_v2_Protocols.io.pdf	genomic DNA	N/A
127	Fig. 3–figsup2	15	SH_Hs_K36m3_10_0801	SH_Hs_K36m3_10_0801	K562_H3K36me3_rem10	CUTAC Removal for K36me3 20 min in K562 cells at home	CUT&TAG-direct	antibody:H3K36me36 Epicypher cat# 13-0031; cell type:K562 human immortalised myelogenous leukemia cell line	Homo sapiens	CUTnTag-direct_v2_Protocols.io.pdf	genomic DNA	N/A
128	Fig. 3–figsup2	16	SH_Hs_K36m3_0801	SH_Hs_K36m3_0801	K562_H3K36me3	CUT&Tag for K36me3 in K562 cells at home	CUT&TAG-direct	antibody:H3K36me36 Epicypher cat# 13-0031; cell type:K562 human immortalised myelogenous leukemia cell line	Homo sapiens	CUTnTag-direct_v2_Protocols.io.pdf	genomic DNA	N/A
129	Fig. 3–figsup2	17	SH_Hs_K9m3_10_0801	SH_Hs_K9m3_10_0801	K562_H3K9me3_rem10	CUTAC Removal for K9me3 20 min in K562 cells at home	CUT&TAG-direct	antibody:H3K9me3 Abcam ab8898 lot GR3302452-1; cell type:K562 human immortalised myelogenous leukemia cell line	Homo sapiens	CUTnTag-direct_v2_Protocols.io.pdf	genomic DNA	N/A
130	Fig. 3–figsup2	18	SH_Hs_K9m3_0801	SH_Hs_K9m3_0801	K562_H3K9me3	CUT&Tag for K9me3 in K562 cells at home	CUT&TAG-direct	antibody:H3K9me3 Abcam ab8898 lot GR3302452-1; cell type:K562 human immortalised myelogenous leukemia cell line	Homo sapiens	CUTnTag-direct_v2_Protocols.io.pdf	genomic DNA	N/A
131	Fig. 3–figsup2	19	SH_Hs_K27m3_10_0801	SH_Hs_K27m3_10_0801	K562_H3K27me3_rem10	CUTAC Removal for K27me3 20 min in K562 cells at home	CUT&TAG-direct	antibody:H3K27me3 Cell Signalling Technoloties cat#9733; cell type:K562 human immortalised myelogenous leukemia cell line	Homo sapiens	CUTnTag-direct_v2_Protocols.io.pdf	genomic DNA	N/A
132	Fig. 3–figsup2	20	SH_Hs_K27m3_0801	SH_Hs_K27m3_0801	K562_H3K27me3	CUT&Tag for K27me3 in K562 cells at home	CUT&TAG-direct	antibody:H3K27me3 Cell Signalling Technoloties cat#9733; cell type:K562 human immortalised myelogenous leukemia cell line	Homo sapiens	CUTnTag-direct_v2_Protocols.io.pdf	genomic DNA	N/A
133	Fig. 3–figsup2	21	SH_Hs_NPAT_10_0801	SH_Hs_NPAT_10_0801	K562_NPAT_rem10	CUTAC Removal for NPAT 20 min in K562 cells at home	CUT&TAG-direct	antibody:Thermo cat# PA566839; cell type:K562 human immortalised myelogenous leukemia cell line	Homo sapiens	CUTnTag-direct_v2_Protocols.io.pdf	genomic DNA	N/A
134	Fig. 3–figsup2	22	SH_Hs_NPAT_0801	SH_Hs_NPAT_0801	K562_NPAT	CUT&Tag for NPAT in K562 cells at home	CUT&TAG-direct	antibody:Thermo cat# PA566839; cell type:K562 human immortalised myelogenous leukemia cell line	Homo sapiens	CUTnTag-direct_v2_Protocols.io.pdf	genomic DNA	N/A
135	Fig. 3–figsup3	4	SH_Hs_5_K4me2E_0627	SH_Hs_5_K4me2E_0627	K562_H3K4me2_dil5	CUTAC Dilution for K4me2 pAG-Tn5 5 min in K562 cells at home	CUT&TAG-direct	antibody:H3K4me2 Epicypher cat# 13-0027; cell type:K562 human immortalised myelogenous leukemia cell line	Homo sapiens	CUTnTag-direct_v2_Protocols.io.pdf	genomic DNA	N/A
136	Fig. 3–figsup3	5	SH_Hs_30L_K4me2_0620	SH_Hs_30L_K4me2_0620	K562_H3K4me2_dil30L	CUTAC Dilution for K4me2 pAG-Tn5 1:60 30 min in K562 cells at home	CUT&TAG-direct	antibody:H3K4me2 Epicypher cat# 13-0027; cell type:K562 human immortalised myelogenous leukemia cell line	Homo sapiens	CUTnTag-direct_v2_Protocols.io.pdf	genomic DNA	N/A
137	Fig. 3–figsup3	6	SH_Hs_10_K4me2_0620	SH_Hs_10_K4me2_0620	K562_H3K4me2_dil10	CUTAC Dilution for K4me2 pAG-Tn5 1:20 10 min in K562 cells at home	CUT&TAG-direct	antibody:H3K4me2 Epicypher cat# 13-0027; cell type:K562 human immortalised myelogenous leukemia cell line	Homo sapiens	CUTnTag-direct_v2_Protocols.io.pdf	genomic DNA	N/A
138	Fig. 3–figsup3	7	SH_Hs_10L_K4me2_0620	SH_Hs_10L_K4me2_0620	K562_H3K4me2_dil10L	CUTAC Dilution for K4me2 pAG-Tn5 1:60 10 min in K562 cells at home	CUT&TAG-direct	antibody:H3K4me2 Epicypher cat# 13-0027; cell type:K562 human immortalised myelogenous leukemia cell line	Homo sapiens	CUTnTag-direct_v2_Protocols.io.pdf	genomic DNA	N/A
139	Fig. 3–figsup3	8	SH_Hs_30_K4me2_0620	SH_Hs_30_K4me2_0620	K562_H3K4me2_dil30	CUTAC Dilution for K4me2 pAG-Tn5 1:40 30 min in K562 cells at home	CUT&TAG-direct	antibody:H3K4me2 Epicypher cat# 13-0027; cell type:K562 human immortalised myelogenous leukemia cell line	Homo sapiens	CUTnTag-direct_v2_Protocols.io.pdf	genomic DNA	N/A
140	Fig. 3–figsup3	9	SH_Hs_LK5n_K4m2E_0615	SH_Hs_LK5n_K4m2E_0615	K562_H3K4me2_dil20	CUTAC Dilution for K4me2 pAG-Tn5 1:20 20 min in K562 cells at home	CUT&TAG-direct	antibody:H3K4me2 Epicypher cat# 13-0027; cell type:K562 human immortalised myelogenous leukemia cell line	Homo sapiens	CUTnTag-direct_v2_Protocols.io.pdf	genomic DNA	N/A
141	Fig. 3–figsup3	10	SH_Hs_5_2K4me2M_0627	SH_Hs_5_2K4me2M_0627	K562_H3K4me2M_dil5	CUTAC Dilution for K4me2 pAG-Tn5 1:40 5 min in K562 cells at home	CUT&TAG-direct	antibody:H3K4me2 Epicypher cat# 13-0027; cell type:K562 human immortalised myelogenous leukemia cell line	Homo sapiens	CUTnTag-direct_v2_Protocols.io.pdf	genomic DNA	N/A
142	Fig. 3–figsup3	11	SH_Hs_20_K4me2E_0627	SH_Hs_20_K4me2E_0627	K562_H3K4me2_dil20	CUTAC Dilution for K4me2 pAG-Tn5 1:40 20 min in K562 cells at home	CUT&TAG-direct	antibody:H3K4me2 Millipore cat# 07-030 lot 3229364; cell type:K562 human immortalised myelogenous leukemia cell line	Homo sapiens	CUTnTag-direct_v2_Protocols.io.pdf	genomic DNA	N/A
143	Fig. 3–figsup3	12	SH_Hs_60_K4me2_0620	SH_Hs_60_K4me2_0620	K562_H3K4me2_dil60	CUTAC Dilution for K4me2 pAG-Tn5 1:20 60 min in K562 cells at home	CUT&TAG-direct	antibody:H3K4me2 Epicypher cat# 13-0027; cell type:K562 human immortalised myelogenous leukemia cell line	Homo sapiens	CUTnTag-direct_v2_Protocols.io.pdf	genomic DNA	N/A
144	Fig. 3–figsup3	13	SH_Hs_60L_K4me2_0620	SH_Hs_60L_K4me2_0620	K562_H3K4me2_dil60L	CUTAC Dilution for K4me2 pAG-Tn5 1:60 60 min in K562 cells at home	CUT&TAG-direct	antibody:H3K4me2 Millipore cat# 07-030 lot 3229364; cell type:K562 human immortalised myelogenous leukemia cell line	Homo sapiens	CUTnTag-direct_v2_Protocols.io.pdf	genomic DNA	N/A
145	Fig. 3–figsup3	14	SH_Hs_RT5_K4me2E_0627	SH_Hs_RT5_K4me2E_0627	K562_H3K4me2_dil5RT	CUTAC Dilution for K4me2 pAG-Tn5 1:20 60 min 22deg in K562 cells at home	CUT&TAG-direct	antibody:H3K4me2 Epicypher cat# 13-0027; cell type:K562 human immortalised myelogenous leukemia cell line	Homo sapiens	CUTnTag-direct_v2_Protocols.io.pdf	genomic DNA	N/A
146	Fig. 3–figsup3	15	SH_Hs_20_2K4me2M_0627	SH_Hs_20_2K4me2M_0627	K562_H3K4me2M_dil20	CUTAC Dilution for K4me2 pAG-Tn5 1:40 20 min in K562 cells at home	CUT&TAG-direct	antibody:H3K4me2 Epicypher cat# 13-0027; cell type:K562 human immortalised myelogenous leukemia cell line	Homo sapiens	CUTnTag-direct_v2_Protocols.io.pdf	genomic DNA	N/A
147	Fig. 3–figsup3	16	SH_Hs_RT2h_K4me2E_0627	SH_Hs_RT2h_K4me2E_0627	K562_H3K4me2_dil120RT	CUTAC Dilution for K4me2 pAG-Tn5 120 min 22deg in K562 cells at home	CUT&TAG-direct	antibody:H3K4me2 Epicypher cat# 13-0027; cell type:K562 human immortalised myelogenous leukemia cell line	Homo sapiens	CUTnTag-direct_v2_Protocols.io.pdf	genomic DNA	N/A
148	Fig. 3–figsup3	17	SH_Hs_RT60_2K4me2M_0627	SH_Hs_RT60_2K4me2M_0627	K562_H3K4me2_dil60RT	CUTAC Dilution for K4me2 pAG-Tn5 60 min 22deg in K562 cells at home	CUT&TAG-direct	antibody:H3K4me2 Millipore cat# 07-030 lot 3229364; cell type:K562 human immortalised myelogenous leukemia cell line	Homo sapiens	CUTnTag-direct_v2_Protocols.io.pdf	genomic DNA	N/A
149	Fig. 3–figsup3	18	SH_Hs_RT2h_2K4me2M_0627	SH_Hs_RT2h_2K4me2M_0627	K562_H3K4me2M_dil120RT	CUTAC Dilution for K4me2 pAG-Tn5 120 min 22deg in K562 cells at home	CUT&TAG-direct	antibody:H3K4me2 Millipore cat# 07-030 lot 3229364; cell type:K562 human immortalised myelogenous leukemia cell line	Homo sapiens	CUTnTag-direct_v2_Protocols.io.pdf	genomic DNA	N/A
150	Fig. 3–figsup3	19	SH_Hs_RT20_K4me2E_0627	SH_Hs_RT20_K4me2E_0627	K562_H3K4me2_dil20RT	CUTAC Dilution for K4me2 pAG-Tn5 20 min 22deg in K562 cells at home	CUT&TAG-direct	antibody:H3K4me2 Epicypher cat# 13-0027; cell type:K562 human immortalised myelogenous leukemia cell line	Homo sapiens	CUTnTag-direct_v2_Protocols.io.pdf	genomic DNA	N/A
151	Fig. 3–figsup3	20	SH_Hs_5m_K4m2E_0629	SH_Hs_5m_K4m2E_0629	K562_H3K4me2_dil5_2	CUTAC Dilution for K4me2 pAG-Tn5 5 min in K562 cells at home	CUT&TAG-direct	antibody:H3K4me2 Epicypher cat# 13-0027; cell type:K562 human immortalised myelogenous leukemia cell line	Homo sapiens	CUTnTag-direct_v2_Protocols.io.pdf	genomic DNA	N/A
152	Fig. 3–figsup3	21	SH_Hs_RT60_K4me2E_0627	SH_Hs_RT60_K4me2E_0627	K562_H3K4me2_dil60RT	CUTAC Dilution for K4me2 pAG-Tn5 60 min 22deg in K562 cells at home	CUT&TAG-direct	antibody:H3K4me2 Epicypher cat# 13-0027; cell type:K562 human immortalised myelogenous leukemia cell line	Homo sapiens	CUTnTag-direct_v2_Protocols.io.pdf	genomic DNA	N/A
153	Fig. 3–figsup3	22	SH_Hs_60_K4me2_0622	SH_Hs_60_K4me2_0622	K562_H3K4me2_dil60_1	CUTAC Dilution for K4me2 pAG-Tn5 1:20 60 min in K562 cells at home	CUT&TAG-direct	antibody:H3K4me2 Epicypher cat# 13-0027; cell type:K562 human immortalised myelogenous leukemia cell line	Homo sapiens	CUTnTag-direct_v2_Protocols.io.pdf	genomic DNA	N/A
154	Fig. 3–figsup3	23	SH_Hs_HRT_K4me2E_0627	SH_Hs_HRT_K4me2E_0627	K562_H3K4me2_CnT_RT	CUTAC Dilution for K4me2 pAG-Tn5 1:40 22deg 20 min in K562 cells at home	CUT&TAG-direct	antibody:H3K4me2 Millipore cat# 07-030 lot 3229364; cell type:K562 human immortalised myelogenous leukemia cell line	Homo sapiens	CUTnTag-direct_v2_Protocols.io.pdf	genomic DNA	N/A
155	Fig. 3–figsup3	24	SH_Hs_HL_K4me2_0620	SH_Hs_HL_K4me2_0620	K562_H3K4me2_CnT_1	CUT&Tag for K4me2 pAG-Tn5 1:60 in K562 cells at home	CUT&TAG-direct	antibody:H3K4me2 Epicypher cat# 13-0027; cell type:K562 human immortalised myelogenous leukemia cell line	Homo sapiens	CUTnTag-direct_v2_Protocols.io.pdf	genomic DNA	N/A
156	Fig. 3–figsup3	25	SH_Hs_H_K4me2_0620	SH_Hs_H_K4me2_0620	K562_H3K4me2_CnT_2	CUT&Tag for K4me2 pAG-Tn5 1:20 in K562 at home	CUT&TAG-direct	antibody:H3K4me2 Epicypher cat# 13-0027; cell type:K562 human immortalised myelogenous leukemia cell line	Homo sapiens	CUTnTag-direct_v2_Protocols.io.pdf	genomic DNA	N/A
157	Fig. 3–figsup3	26	SH_Hs_K5n_K4me2E_0615	SH_Hs_K5n_K4me2E_0615	K562_H3K4me2_CnT_8	CUT&Tag for K4me2 pAG-Tn5 1:20 in K562 at home	CUT&TAG-direct	antibody:H3K4me2 Epicypher cat# 13-0027; cell type:K562 human immortalised myelogenous leukemia cell line	Homo sapiens	CUTnTag-direct_v2_Protocols.io.pdf	genomic DNA	N/A
158	Fig. 3–figsup3	27	SH_Hs_K5n_K4m2E_0613	SH_Hs_K5n_K4m2E_0613	K562_H3K4me2_CnT_7	CUT&Tag for K4me2 pAG-Tn5 1:20 in K562 at home	CUT&TAG-direct	antibody:H3K4me2 Epicypher cat# 13-0027; cell type:K562 human immortalised myelogenous leukemia cell line	Homo sapiens	CUTnTag-direct_v2_Protocols.io.pdf	genomic DNA	N/A
159	Fig. 3–figsup3	28	SH_Hs_LK5n_IgG_0615	SH_Hs_LK5n_IgG_0615	K562_IgG_CUTAC	CUTAC Dilution for IgG pAG-Tn5 1:20 60 min in K562 cells at home	CUT&TAG-direct	antibody:H3K4me2 Millipore cat# 07-030 lot 3229364; cell type:K562 human immortalised myelogenous leukemia cell line	Homo sapiens	CUTnTag-direct_v2_Protocols.io.pdf	genomic DNA	N/A
160	Fig. 3–figsup4	1	SH_Hs_K4m2_0726	SH_Hs_K4m2_0726	K562_H3K4me2_CnT_3	CUTAC Removal for K4me2 20 min in K562 cells at home	CUT&TAG-direct	antibody:H3K4me2 Epicypher cat# 13-0027; cell type:K562 human immortalised myelogenous leukemia cell line	Homo sapiens	CUTnTag-direct_v2_Protocols.io.pdf	genomic DNA	N/A
161	Fig. 3–figsup4	2	SH_Hs_K4m2_37con20a_0726	SH_Hs_K4m2_37con20a_0726	K562_H3K4me2_rem20_1	CUTAC Removal for K4me2 20 min in K562 cells at home	CUT&TAG-direct	antibody:H3K4me2 Epicypher cat# 13-0027; cell type:K562 human immortalised myelogenous leukemia cell line	Homo sapiens	CUTnTag-direct_v2_Protocols.io.pdf	genomic DNA	N/A
162	Fig. 3–figsup4	3	SH_Hs_K4m2_37hex5b_0726	SH_Hs_K4m2_37hex5b_0726	K562_H3K4me2_hex5	CUTAC Removal for K4me2 5 min in K562 cells at home	CUT&TAG-direct	antibody:H3K4me2 Epicypher cat# 13-0027; cell type:K562 human immortalised myelogenous leukemia cell line	Homo sapiens	CUTnTag-direct_v2_Protocols.io.pdf	genomic DNA	N/A
163	Fig. 3–figsup4	4	SH_Hs_K4m2_37dmf20_0726	SH_Hs_K4m2_37dmf20_0726	K562_H3K4me2_dmf20	CUTAC Removal for K4me2 60 min dmf in K562 cells at home	CUT&TAG-direct	antibody:H3K4me2 Epicypher cat# 13-0027; cell type:K562 human immortalised myelogenous leukemia cell line	Homo sapiens	CUTnTag-direct_v2_Protocols.io.pdf	genomic DNA	N/A
164	Fig. 4–figsup1	1	SH_Hs_K4m2_37con20a_0726	SH_Hs_K4m2_37con20a_0726	K562_H3K4me2_rem20_1	CUTAC Removal for K4me2 20 min in K562 cells at home	CUT&TAG-direct	antibody:H3K4me2 Epicypher cat# 13-0027; cell type:K562 human immortalised myelogenous leukemia cell line	Homo sapiens	CUTnTag-direct_v2_Protocols.io.pdf	genomic DNA	N/A
165	Fig. 4–figsup2	1	SH_Hs_K4m2_0726	SH_Hs_K4m2_0726	K562_H3K4me2_CnT_3	CUTAC Removal for K4me2 20 min in K562 cells at home	CUT&TAG-direct	antibody:H3K4me2 Epicypher cat# 13-0027; cell type:K562 human immortalised myelogenous leukemia cell line	Homo sapiens	CUTnTag-direct_v2_Protocols.io.pdf	genomic DNA	N/A
166	Fig. 4–figsup2	2	SH_Hs_K4m2_37con20a_0726	SH_Hs_K4m2_37con20a_0726	K562_H3K4me2_rem20_1	CUTAC Removal for K4me2 20 min in K562 cells at home	CUT&TAG-direct	antibody:H3K4me2 Epicypher cat# 13-0027; cell type:K562 human immortalised myelogenous leukemia cell line	Homo sapiens	CUTnTag-direct_v2_Protocols.io.pdf	genomic DNA	N/A
167	Fig. 5–figsup1A	1	SH_Hs_K4m2_0726	SH_Hs_K4m2_0726	K562_H3K4me2_CnT_3	CUT&Tag for K4me2 in K562 cells at home	CUT&TAG-direct	antibody:H3K4me2 Epicypher cat# 13-0027; cell type:K562 human immortalised myelogenous leukemia cell line	Homo sapiens	CUTnTag-direct_v2_Protocols.io.pdf	genomic DNA	N/A
168	Fig. 5–figsup1A	2	SH_Hs_K4m2_37con20a_0726	SH_Hs_K4m2_37con20a_0726	K562_H3K4me2_rem20_1	CUTAC Removal for K4me2 20 min in K562 cells at home	CUT&TAG-direct	antibody:H3K4me2 Epicypher cat# 13-0027; cell type:K562 human immortalised myelogenous leukemia cell line	Homo sapiens	CUTnTag-direct_v2_Protocols.io.pdf	genomic DNA	N/A
169	Fig. 5–figsup1B	1	SH_Hs_H1K4me2E_1005	SH_Hs_H1K4me2E_1005	H1_H3K4me2_p-w	CUTAC Post-wash for K4me2 in H1 ES cells at home	CUT&TAG-direct	antibody:H3K4me2 Epicypher cat# 13-0027; cell type:H1 human embryonic stem cell line	Homo sapiens	CUTnTag-direct_v2_Protocols.io.pdf	genomic DNA	N/A
170	Fig. 5–figsup1B	4	SH_Hs_H1K4me2E_con_1005	SH_Hs_H1K4me2E_con_1005	H1_H3K4me2_con_p-w	CUTAC Post-wash for K4me2 20 min in H1 ES cells at home	CUT&TAG-direct	antibody:H3K4me2 Epicypher cat# 13-0027; cell type:H1 human embryonic stem cell line	Homo sapiens	CUTnTag-direct_v2_Protocols.io.pdf	genomic DNA	N/A
171	Fig. 5–figsup1B	5	SH_Hs_H1K4me2E_RT_1005	SH_Hs_H1K4me2E_RT_1005	H1_H3K4me2_RT_p-w	CUTAC Post-wash for K4me2 20 min 22deg in H1 ES cells at home	CUT&TAG-direct	antibody:H3K4me2 Epicypher cat# 13-0027; cell type:H1 human embryonic stem cell line	Homo sapiens	CUTnTag-direct_v2_Protocols.io.pdf	genomic DNA	N/A
172	Fig. 5–figsup1B	6	SH_Hs_H1K4me2E_hex_1005	SH_Hs_H1K4me2E_hex_1005	H1_H3K4me2_hex_p-w	CUTAC Post-wash for K4me2 20 min hex in H1 ES cells at home	CUT&TAG-direct	antibody:H3K4me2 Epicypher cat# 13-0027; cell type:H1 human embryonic stem cell line	Homo sapiens	CUTnTag-direct_v2_Protocols.io.pdf	genomic DNA	N/A
173	Fig. 5–figsup1B	7	SH_Hs_H1K4me2E_dmf_1005	SH_Hs_H1K4me2E_dmf_1005	H1_H3K4me2_dmf_p-w	CUTAC Post-wash for K4me2 20 min dmf in H1 ES cells at home	CUT&TAG-direct	antibody:H3K4me2 Epicypher cat# 13-0027; cell type:H1 human embryonic stem cell line	Homo sapiens	CUTnTag-direct_v2_Protocols.io.pdf	genomic DNA	N/A
174	Fig. 5–figsup1B	8	SH_Hs_H1K4me2E_dmfRT_1005	SH_Hs_H1K4me2E_dmfRT_1005	H1_H3K4me2_dmfRT_p-w	CUTAC Post-wash for K4me2 20 min dmf RT in H1 ES cells at home	CUT&TAG-direct	antibody:H3K4me2 Epicypher cat# 13-0027; cell type:H1 human embryonic stem cell line	Homo sapiens	CUTnTag-direct_v2_Protocols.io.pdf	genomic DNA	N/A
175	Fig. 5–figsup1B	9	SH_Hs_H1K4me2E_hdRT_1005	SH_Hs_H1K4me2E_hdRT_1005	H1_H3K4me2_hdRT_p-w	CUTAC Post-wash for K4me2 20 min hex dmf 22deg in H1 ES cells at home	CUT&TAG-direct	antibody:H3K4me2 Epicypher cat# 13-0027; cell type:H1 human embryonic stem cell line	Homo sapiens	CUTnTag-direct_v2_Protocols.io.pdf	genomic DNA	N/A
176	Fig. 5–figsup2	1,2	SH_Hs_H_K4me2_0620	SH_Hs_H_K4me2_0620	K562_H3K4me2_CnT_1	CUT&Tag for K4me2 1:20 in K562 cells at home	CUT&TAG-direct	antibody:H3K4me2 Epicypher cat# 13-0027; cell type:K562 human immortalised myelogenous leukemia cell line	Homo sapiens	CUTnTag-direct_v2_Protocols.io.pdf	genomic DNA	N/A
177	Fig. 5–figsup2	3,4	SH_Hs_10_K4me2_0620	SH_Hs_10_K4me2_0620	K562_H3K4me2_dil10	CUTAC Dilution for K4me2 pAG-Tn5 1:20 10 min in K562 cells at home	CUT&TAG-direct	antibody:H3K4me2 Epicypher cat# 13-0027; cell type:K562 human immortalised myelogenous leukemia cell line	Homo sapiens	CUTnTag-direct_v2_Protocols.io.pdf	genomic DNA	N/A
178	Fig. 5–figsup2	5,6	SH_Hs_K4m2_37con5a_0726	SH_Hs_K4m2_37con5a_0726	K562_H3K4me2_rem5_1	CUTAC Removal for K4me2 5 min in K562 cells at home	CUT&TAG-direct	antibody:H3K4me2 Epicypher cat# 13-0027; cell type:K562 human immortalised myelogenous leukemia cell line	Homo sapiens	CUTnTag-direct_v2_Protocols.io.pdf	genomic DNA	N/A
179	Fig. 5–figsup2	7,8	SH_Hs_K4m2_37con60a_0726	SH_Hs_K4m2_37con60a_0726	K562_H3K4me2_rem60_1	CUTAC Removal for K4me2 5 min in K562 cells at home	CUT&TAG-direct	antibody:H3K4me2 Epicypher cat# 13-0027; cell type:K562 human immortalised myelogenous leukemia cell line	Homo sapiens	CUTnTag-direct_v2_Protocols.io.pdf	genomic DNA	N/A
180	Fig. 5–figsup2	9,10	SH_Hs_K4m2E_60_0809	SH_Hs_K4m2E_60_0809	K562_H3K4me2_p-w_60	CUTAC Post-wash for K4me2 60 min in K562 cells at home	CUT&TAG-direct	antibody:H3K4me2 Epicypher cat# 13-0027; cell type:K562 human immortalised myelogenous leukemia cell line	Homo sapiens	CUTnTag-direct_v2_Protocols.io.pdf	genomic DNA	N/A
181	Fig. 5–figsup2	11,12	SH_Hs_K4m2Es2_60_0809	SH_Hs_K4m2Es2_60_0809	K562_H3K4me2_a-b_60	CUTAC 1% Add-back for K4me2 60 min in K562 cells at home	CUT&TAG-direct	antibody:H3K4me2 Epicypher cat# 13-0027; cell type:K562 human immortalised myelogenous leukemia cell line	Homo sapiens	CUTnTag-direct_v2_Protocols.io.pdf	genomic DNA	N/A
182	Fig. 5–figsup2	13,14	SH_Hs_K4m2_55hd20a_0726	SH_Hs_K4m2_55hd20a_0726	K562_H3K4me2_hd20_55deg	CUTAC Removal for K4me2 20 min hex dmf in K562 cells at home	CUT&TAG-direct	antibody:H3K4me2 Epicypher cat# 13-0027; cell type:K562 human immortalised myelogenous leukemia cell line	Homo sapiens	CUTnTag-direct_v2_Protocols.io.pdf	genomic DNA	N/A
183	Fig. 5–figsup3	3,7,11	SH_Hs_K4m2_37con20a_0726	SH_Hs_K4m2_37con20a_0726	K562_H3K4me2_rem20_1	CUTAC Removal for K4me2 20 min in K562 cells at home	CUT&TAG-direct	antibody:H3K4me2 Epicypher cat# 13-0027; cell type:K562 human immortalised myelogenous leukemia cell line	Homo sapiens	CUTnTag-direct_v2_Protocols.io.pdf	genomic DNA	N/A
184	Fig. 5–figsup3	4,8,12	SH_Hs_K4m2_37dmf20_0726	SH_Hs_K4m2_37dmf20_0726	K562_H3K4me2_dmf20	CUTAC Removal for K4me2 60 min dmf in K562 cells at home	CUT&TAG-direct	antibody:H3K4me2 Epicypher cat# 13-0027; cell type:K562 human immortalised myelogenous leukemia cell line	Homo sapiens	CUTnTag-direct_v2_Protocols.io.pdf	genomic DNA	N/A
185	Fig. 5–figsup3	5,9,13	SH_Hs_K4m2_37hex20a_0726	SH_Hs_K4m2_37hex20a_0726	K562_H3K4me2_hex20_1	CUTAC Removal for K4me2 20 min hex in K562 cells at home	CUT&TAG-direct	antibody:H3K4me2 Epicypher cat# 13-0027; cell type:K562 human immortalised myelogenous leukemia cell line	Homo sapiens	CUTnTag-direct_v2_Protocols.io.pdf	genomic DNA	N/A
186	Fig. 5–figsup3	6,10,14	SH_Hs_K4m2_0726	SH_Hs_K4m2_0726	K562_H3K4me2_CnT_3	CUT&Tag for K4me2 in K562 cells at home	CUT&TAG-direct	antibody:H3K4me2 Epicypher cat# 13-0027; cell type:K562 human immortalised myelogenous leukemia cell line	Homo sapiens	CUTnTag-direct_v2_Protocols.io.pdf	genomic DNA	N/A
187	Fig. 6–figsup1	1	SH_Hs_K4me3_1005	SH_Hs_K4me3_1005	K562_H3K4me3_CnT_4	CUT&Tag K4me3 in K562 cells at home	CUT&TAG-direct	antibody:H3K4me3 Active Motif cat# 39159 lot# 22118006; cell type:K562 human immortalised myelogenous leukemia cell line	Homo sapiens	CUTnTag-direct_v2_Protocols.io.pdf	genomic DNA	N/A
188	Fig. 6–figsup1	2	SH_Hs_K4me3_con_1005	SH_Hs_K4me3_con_1005	K562_H3K4me3_con_p-w	CUTAC Post-wash for K4me3 20 min in K562 cells at home	CUT&TAG-direct	antibody:H3K4me3 Active Motif cat# 39159 lot# 22118006; cell type:K562 human immortalised myelogenous leukemia cell line	Homo sapiens	CUTnTag-direct_v2_Protocols.io.pdf	genomic DNA	N/A
189	Fig. 6–figsup1	3	SH_Hs_K4m2_0726	SH_Hs_K4m2_0726	K562_H3K4me2_CnT_3	CUT&Tag for K4me2 in K562 cells at home	CUT&TAG-direct	antibody:H3K4me2 Epicypher cat# 13-0027; cell type:K562 human immortalised myelogenous leukemia cell line	Homo sapiens	CUTnTag-direct_v2_Protocols.io.pdf	genomic DNA	N/A
190	Fig. 6–figsup1	4	SH_Hs_K4m2_37con20a_0726	SH_Hs_K4m2_37con20a_0726	K562_H3K4me2_rem20_1	CUTAC Removal for K4me2 20 min in K562 cells at home	CUT&TAG-direct	antibody:H3K4me2 Epicypher cat# 13-0027; cell type:K562 human immortalised myelogenous leukemia cell line	Homo sapiens	CUTnTag-direct_v2_Protocols.io.pdf	genomic DNA	N/A

## Sheet: Datasets in GEO
Figure	Panel/Track	Sample	Illumina Sample Name	Short Name	Description	Source name	Characteristics	Organism	Extraction protocol	Library source	Library protocol
Fig. S5A	4	SH_Hs_H1_K4m2E_60_0810	SH_Hs_H1_K4m2E_60_0810	H1_K4me2_p-w_60	CUTAC Post-wash for K4me2 60 min in H1 ES cells at home	CUT&TAG-direct	antibody:H3K4me2 Epicypher cat# 13-0027; cell type:H1 human embryonic stem cell line	Homo sapiens	CUTnTag-direct_v2_Protocols.io.pdf	genomic DNA	N/A
Fig. S2	14	SH_Hs_H2AZ_0801	SH_Hs_H2AZ_0801	K562_H2AZ	CUT&Tag for H2AZ in K562 cells at home	CUT&TAG-direct	antibody:H2AZ Active Motif cat. #39113; cell type:K562 human immortalised myelogenous leukemia cell line	Homo sapiens	CUTnTag-direct_v2_Protocols.io.pdf	genomic DNA	N/A
Fig. S2	13	SH_Hs_H2AZ_10_0801	SH_Hs_H2AZ_10_0801	K562_H2AZ_rem10	CUTAC Removal for H2AZ 10 min in K562 cells at home	CUT&TAG-direct	antibody:H2AZ Active Motif cat. #39113; cell type:K562 human immortalised myelogenous leukemia cell line	Homo sapiens	CUTnTag-direct_v2_Protocols.io.pdf	genomic DNA	N/A
Fig. S2	12	SH_Hs_K27ac_0801	SH_Hs_K27ac_0801	K562_H3K27ac	CUT&Tag for K27ac in K562 cells at home	CUT&TAG-direct	antibody:H3K27ac Millipore MABE647 lot RM172; cell type:K562 human immortalised myelogenous leukemia cell line	Homo sapiens	CUTnTag-direct_v2_Protocols.io.pdf	genomic DNA	N/A
Fig. S2	11	SH_Hs_K27ac_10_0801	SH_Hs_K27ac_10_0801	K562_H3K27ac_rem10	CUTAC Removal for K27ac 20 min in K562 cells at home	CUT&TAG-direct	antibody:H3K27ac Millipore MABE647 lot RM172; cell type:K562 human immortalised myelogenous leukemia cell line	Homo sapiens	CUTnTag-direct_v2_Protocols.io.pdf	genomic DNA	N/A
Fig. S2	20	SH_Hs_K27m3_0801	SH_Hs_K27m3_0801	K562_H3K27me3	CUT&Tag for K27me3 in K562 cells at home	CUT&TAG-direct	antibody:H3K27me3 Cell Signalling Technoloties cat#9733; cell type:K562 human immortalised myelogenous leukemia cell line	Homo sapiens	CUTnTag-direct_v2_Protocols.io.pdf	genomic DNA	N/A
Fig. S2	19	SH_Hs_K27m3_10_0801	SH_Hs_K27m3_10_0801	K562_H3K27me3_rem10	CUTAC Removal for K27me3 20 min in K562 cells at home	CUT&TAG-direct	antibody:H3K27me3 Cell Signalling Technoloties cat#9733; cell type:K562 human immortalised myelogenous leukemia cell line	Homo sapiens	CUTnTag-direct_v2_Protocols.io.pdf	genomic DNA	N/A
Fig. S2	16	SH_Hs_K36m3_0801	SH_Hs_K36m3_0801	K562_H3K36me3	CUT&Tag for K36me3 in K562 cells at home	CUT&TAG-direct	antibody:H3K36me36 Epicypher cat# 13-0031; cell type:K562 human immortalised myelogenous leukemia cell line	Homo sapiens	CUTnTag-direct_v2_Protocols.io.pdf	genomic DNA	N/A
Fig. S2	15	SH_Hs_K36m3_10_0801	SH_Hs_K36m3_10_0801	K562_H3K36me3_rem10	CUTAC Removal for K36me3 20 min in K562 cells at home	CUT&TAG-direct	antibody:H3K36me36 Epicypher cat# 13-0031; cell type:K562 human immortalised myelogenous leukemia cell line	Homo sapiens	CUTnTag-direct_v2_Protocols.io.pdf	genomic DNA	N/A
Fig. S2	10	SH_Hs_K4m1_0801	SH_Hs_K4m1_0801	K562_H3K4me1	CUT&Tag for K4me1 in K562 cells at home	CUT&TAG-direct	antibody:Epicypher 13-0040; cell type:K562 human immortalised myelogenous leukemia cell line	Homo sapiens	CUTnTag-direct_v2_Protocols.io.pdf	genomic DNA	N/A
Fig. S2	9	SH_Hs_K4m1_10_0801	SH_Hs_K4m1_10_0801	K562_H3K4me1_rem10	CUTAC Removal for K4me1 20 min in K562 cells at home	CUT&TAG-direct	antibody:Epicypher 13-0040; cell type:K562 human immortalised myelogenous leukemia cell line	Homo sapiens	CUTnTag-direct_v2_Protocols.io.pdf	genomic DNA	N/A
Fig. 3E	3	SH_Hs_K4m2_37dmf20_0726	SH_Hs_K4m2_37dmf20_0726	K562_H3K4me2_dmf20	CUTAC Removal for K4me2 20 min dmf in K562 cells at home	CUT&TAG-direct	antibody:H3K4me2 Epicypher cat# 13-0027; cell type:K562 human immortalised myelogenous leukemia cell line	Homo sapiens	CUTnTag-direct_v2_Protocols.io.pdf	genomic DNA	N/A
Fig. 3F	2	SH_Hs_K4m2_37dmf5a_0726	SH_Hs_K4m2_37dmf5a_0726	K562_H3K4me2_dmf5	CUTAC Removal for K4me2 5 min dmf in K562 cells at home	CUT&TAG-direct	antibody:H3K4me2 Epicypher cat# 13-0027; cell type:K562 human immortalised myelogenous leukemia cell line	Homo sapiens	CUTnTag-direct_v2_Protocols.io.pdf	genomic DNA	N/A
Fig. 3F	2	SH_Hs_K4m2_37dmf60_0726	SH_Hs_K4m2_37dmf60_0726	K562_H3K4me2_dmf60	CUTAC Removal for K4me2 60 min dmf in K562 cells at home	CUT&TAG-direct	antibody:H3K4me2 Epicypher cat# 13-0027; cell type:K562 human immortalised myelogenous leukemia cell line	Homo sapiens	CUTnTag-direct_v2_Protocols.io.pdf	genomic DNA	N/A
Fig. 3F	4	SH_Hs_K4m2_55hd20a_0726	SH_Hs_K4m2_55hd20a_0726	K562_H3K4me2_hd20_55deg	CUTAC Removal for K4me2 20 min hex dmf in K562 cells at home	CUT&TAG-direct	antibody:H3K4me2 Epicypher cat# 13-0027; cell type:K562 human immortalised myelogenous leukemia cell line	Homo sapiens	CUTnTag-direct_v2_Protocols.io.pdf	genomic DNA	N/A
Fig. 3F	4	SH_Hs_K4m2_55hd5a_0726	SH_Hs_K4m2_55hd5a_0726	K562_H3K4me2_hd5_55deg	CUTAC Removal for K4me2 5 min hex dmf in K562 cells at home	CUT&TAG-direct	antibody:H3K4me2 Epicypher cat# 13-0027; cell type:K562 human immortalised myelogenous leukemia cell line	Homo sapiens	CUTnTag-direct_v2_Protocols.io.pdf	genomic DNA	N/A
Fig. 3E	4	SH_Hs_K4m2_55hd60a_0726	SH_Hs_K4m2_55hd60a_0726	K562_H3K4me2_hd60_55deg	CUTAC Removal for K4me2 60 min hex + dmf 55deg in K562 cells at home	CUT&TAG-direct	antibody:H3K4me2 Epicypher cat# 13-0027; cell type:K562 human immortalised myelogenous leukemia cell line	Homo sapiens	CUTnTag-direct_v2_Protocols.io.pdf	genomic DNA	N/A
Fig. S4B	6	SH_Hs_K4m2_37hex60a_0726	SH_Hs_K4m2_37hex60a_0726	K562_H3K4me2_he60	CUTAC Removal for K4me2 20 min hex in K562 cells at home	CUT&TAG-direct	antibody:H3K4me2 Epicypher cat# 13-0027; cell type:K562 human immortalised myelogenous leukemia cell line	Homo sapiens	CUTnTag-direct_v2_Protocols.io.pdf	genomic DNA	N/A
Fig. 3E	2	SH_Hs_K4m2_37hex20a_0726	SH_Hs_K4m2_37hex20a_0726	K562_H3K4me2_hex20_1	CUTAC Removal for K4me2 20 min hex in K562 cells at home	CUT&TAG-direct	antibody:H3K4me2 Epicypher cat# 13-0027; cell type:K562 human immortalised myelogenous leukemia cell line	Homo sapiens	CUTnTag-direct_v2_Protocols.io.pdf	genomic DNA	N/A
Fig. S4B	5	SH_Hs_K4m2_37hex20b_0726	SH_Hs_K4m2_37hex20b_0726	K562_H3K4me2_hex20_2	CUTAC Removal for K4me2 5 min hex in K562 cells at home	CUT&TAG-direct	antibody:H3K4me2 Epicypher cat# 13-0027; cell type:K562 human immortalised myelogenous leukemia cell line	Homo sapiens	CUTnTag-direct_v2_Protocols.io.pdf	genomic DNA	N/A
Fig. S4B	4	SH_Hs_K4m2_37hex5b_0726	SH_Hs_K4m2_37hex5b_0726	K562_H3K4me2_hex5	CUTAC Removal for K4me2 5 min in K562 cells at home	CUT&TAG-direct	antibody:H3K4me2 Epicypher cat# 13-0027; cell type:K562 human immortalised myelogenous leukemia cell line	Homo sapiens	CUTnTag-direct_v2_Protocols.io.pdf	genomic DNA	N/A
Fig 3A gel		SH_Hs_K4m2_37con20a_0726	SH_Hs_K4m2_37con20a_0726	K562_H3K4me2_rem20_1	CUTAC Removal for K4me2 20 min in K562 cells at home	CUT&TAG-direct	antibody:H3K4me2 Epicypher cat# 13-0027; cell type:K562 human immortalised myelogenous leukemia cell line	Homo sapiens	CUTnTag-direct_v2_Protocols.io.pdf	genomic DNA	N/A
Fig 3A gel		SH_Hs_K4m2_37con5a_0726	SH_Hs_K4m2_37con5a_0726	K562_H3K4me2_rem5_1	CUTAC Removal for K4me2 5 min in K562 cells at home	CUT&TAG-direct	antibody:H3K4me2 Epicypher cat# 13-0027; cell type:K562 human immortalised myelogenous leukemia cell line	Homo sapiens	CUTnTag-direct_v2_Protocols.io.pdf	genomic DNA	N/A
Fig. 4D peaks	2	SH_Hs_K4m2_37con5b_0726	SH_Hs_K4m2_37con5b_0726	K562_H3K4me2_rem5_2	CUTAC Removal for K4me2 5 min in K562 cells at home	CUT&TAG-direct	antibody:H3K4me2 Epicypher cat# 13-0027; cell type:K562 human immortalised myelogenous leukemia cell line	Homo sapiens	CUTnTag-direct_v2_Protocols.io.pdf	genomic DNA	N/A
Fig 3A gel		SH_Hs_K4me2_37con60_0726	SH_Hs_K4me2_37con60_0726	K562_H3K4me2_rem60_1	CUTAC Removal for K4me2 5 min in K562 cells at home	CUT&TAG-direct	antibody:H3K4me2 Epicypher cat# 13-0027; cell type:K562 human immortalised myelogenous leukemia cell line	Homo sapiens	CUTnTag-direct_v2_Protocols.io.pdf	genomic DNA	N/A
1C		SH_Hs_27m3_200_0321	SH_Hs_27m3_200_0321	K562_K27me3_200_home	CUT&Tag for K27me3 in 200 K562 cells at home	CUT&TAG	antibody:H3K27me3 Cell Signaling Technology cat# 9733; cell type:K562 human immortalised myelogenous leukemia cell line	Homo sapiens	CnTathome_Protocols_io.pdf	genomic DNA	N/A
1C		SH_Hs_27m3_200_0311	SH_Hs_27m3_200_0311	K562_K27me3_200_lab	CUT&Tag for K27me3 in 200 K562 cells in lab	CUT&TAG	antibody:H3K27me3 Cell Signaling Technology cat# 9733; cell type:K562 human immortalised myelogenous leukemia cell line	Homo sapiens	CnTathome_Protocols_io.pdf	genomic DNA	N/A
1C		SH_Hs_27m3_20k_0321	SH_Hs_27m3_20k_0321	K562_K27me3_20k_home	CUT&Tag for K27me3 in 20,000 K562 cells at home	CUT&TAG	antibody:H3K27me3 Cell Signaling Technology cat# 9733; cell type:K562 human immortalised myelogenous leukemia cell line	Homo sapiens	CnTathome_Protocols_io.pdf	genomic DNA	N/A
1C		SH_Hs_27m3_20k_0311	SH_Hs_27m3_20k_0311	K562_K27me3_20k_lab	CUT&Tag for K27me3 in 20,000 K562 cells in lab	CUT&TAG	antibody:H3K27me3 Cell Signaling Technology cat# 9733; cell type:K562 human immortalised myelogenous leukemia cell line	Homo sapiens	CnTathome_Protocols_io.pdf	genomic DNA	N/A
1C		SH_Hs_27m3_2000_0321	SH_Hs_27m3_2000_0321	K562_K27me3_2k_home	CUT&Tag for K27me3 in 2,000 K562 cells at home	CUT&TAG	antibody:H3K27me3 Cell Signaling Technology cat# 9733; cell type:K562 human immortalised myelogenous leukemia cell line	Homo sapiens	CnTathome_Protocols_io.pdf	genomic DNA	N/A
1C		SH_Hs_27m3_2000_0311	SH_Hs_27m3_2000_0311	K562_K27me3_2k_lab	CUT&Tag for K27me3 in 2,000 K562 cells in lab	CUT&TAG	antibody:H3K27me3 Cell Signaling Technology cat# 9733; cell type:K562 human immortalised myelogenous leukemia cell line	Homo sapiens	CnTathome_Protocols_io.pdf	genomic DNA	N/A
1C		SH_Hs_27m3_65_0321	SH_Hs_27m3_65_0321	K562_K27me3_60_home	CUT&Tag for K27me3 in 60 K562 cells at home	CUT&TAG	antibody:H3K27me3 Cell Signaling Technology cat# 9733; cell type:K562 human immortalised myelogenous leukemia cell line	Homo sapiens	CnTathome_Protocols_io.pdf	genomic DNA	N/A
1C		SH_Hs_27m3_65_0311	SH_Hs_27m3_65_0311	K562_K27me3_60_lab	CUT&Tag for K27me3 in 60 K562 cells in lab	CUT&TAG	antibody:H3K27me3 Cell Signaling Technology cat# 9733; cell type:K562 human immortalised myelogenous leukemia cell line	Homo sapiens	CnTathome_Protocols_io.pdf	genomic DNA	N/A
1C		SH_Hs_27m3_650_0321	SH_Hs_27m3_650_0321	K562_K27me3_600_home	CUT&Tag for K27me3 in 600 K562 cells at home	CUT&TAG	antibody:H3K27me3 Cell Signaling Technology cat# 9733; cell type:K562 human immortalised myelogenous leukemia cell line	Homo sapiens	CnTathome_Protocols_io.pdf	genomic DNA	N/A
1C		SH_Hs_27m3_650_0311	SH_Hs_27m3_650_0311	K562_K27me3_600_lab	CUT&Tag for K27me3 in 600 K562 cells in lab	CUT&TAG	antibody:H3K27me3 Cell Signaling Technology cat# 9733; cell type:K562 human immortalised myelogenous leukemia cell line	Homo sapiens	CnTathome_Protocols_io.pdf	genomic DNA	N/A
1C		SH_Hs_27m3_65k_0321	SH_Hs_27m3_65k_0321	K562_K27me3_60k_home	CUT&Tag for K27me3 in 60,000 K562 cells at home	CUT&TAG	antibody:H3K27me3 Cell Signaling Technology cat# 9733; cell type:K562 human immortalised myelogenous leukemia cell line	Homo sapiens	CnTathome_Protocols_io.pdf	genomic DNA	N/A
1C		SH_Hs_27m3_65k_0311	SH_Hs_27m3_65k_0311	K562_K27me3_60k_lab	CUT&Tag for K27me3 in 60,000 K562 cells in lab	CUT&TAG	antibody:H3K27me3 Cell Signaling Technology cat# 9733; cell type:K562 human immortalised myelogenous leukemia cell line	Homo sapiens	CnTathome_Protocols_io.pdf	genomic DNA	N/A
1C		SH_Hs_27m3_6500_0321	SH_Hs_27m3_6500_0321	K562_K27me3_6k_home	CUT&Tag for K27me3 in 6,000 K562 cells at home	CUT&TAG	antibody:H3K27me3 Cell Signaling Technology cat# 9733; cell type:K562 human immortalised myelogenous leukemia cell line	Homo sapiens	CnTathome_Protocols_io.pdf	genomic DNA	N/A
1C		SH_Hs_27m3_6500_0311	SH_Hs_27m3_6500_0311	K562_K27me3_6k_lab	CUT&Tag for K27me3 in 6,000 K562 cells in lab	CUT&TAG	antibody:H3K27me3 Cell Signaling Technology cat# 9733; cell type:K562 human immortalised myelogenous leukemia cell line	Homo sapiens	CnTathome_Protocols_io.pdf	genomic DNA	N/A
Fig. S2	4	SH_Hs_K4m2M_15k_0803	SH_Hs_K4m2M_15k_0803	K562_K4m2M_rem20_1	CUT&Tag for K4me2 in K562 cells at home	CUT&TAG-direct	antibody:H3K4me2 Millipore cat# 07-030 lot 3229364; cell type:K562 human immortalised myelogenous leukemia cell line	Homo sapiens	CUTnTag-direct_v2_Protocols.io.pdf	genomic DNA	N/A
Fig. S2	3	SH_Hs_K4m2M_15kA_0803	SH_Hs_K4m2M_15kA_0803	K562_K4m2M_rem20_2	CUTAC Removal for K4me2 20 min in K562 cells at home	CUT&TAG-direct	antibody:H3K4me2 Millipore cat# 07-030 lot 3229364; cell type:K562 human immortalised myelogenous leukemia cell line	Homo sapiens	CUTnTag-direct_v2_Protocols.io.pdf	genomic DNA	N/A
Fig 3B-C	3	SH_Hs_K5n_K4me1_0615	SH_Hs_K5n_K4me1_0615	K562_K4me1	CUT&Tag for K4me1 in K562 cells at home	CUT&TAG-direct	antibody:Epicypher 13-0026 lot 28344001; cell type:K562 human immortalised myelogenous leukemia cell line	Homo sapiens	CUTnTag-direct_v2_Protocols.io.pdf	genomic DNA	N/A
Fig 3B-C	3	SH_Hs_LK5n_K4me1_0615	SH_Hs_LK5n_K4me1_0615	K562_K4me1_dil20	CUTAC Dilution for K4me1 60 min in K562 cells at home	CUT&TAG-direct	antibody:Epicypher 13-0026 lot 28344001; cell type:K562 human immortalised myelogenous leukemia cell line	Homo sapiens	CUTnTag-direct_v2_Protocols.io.pdf	genomic DNA	N/A
Fig 3D	4	SH_Hs_K4m2Es2_60_0809	SH_Hs_K4m2Es2_60_0809	K562_K4me2_a-b_60	CUTAC 1% Add-back for K4me2 60 min in K562 cells at home	CUT&TAG-direct	antibody:H3K4me2 Epicypher cat# 13-0027; cell type:K562 human immortalised myelogenous leukemia cell line	Homo sapiens	CUTnTag-direct_v2_Protocols.io.pdf	genomic DNA	N/A
Fig 3D	1	SH_Hs_H_K4me2_0620	SH_Hs_H_K4me2_0620	K562_K4me2_CnT_1	CUT&Tag for K4me2 1:20 in K562 cells at home	CUT&TAG-direct	antibody:H3K4me2 Epicypher cat# 13-0027; cell type:K562 human immortalised myelogenous leukemia cell line	Homo sapiens	CUTnTag-direct_v2_Protocols.io.pdf	genomic DNA	N/A
Fig. S3	23	SH_Hs_HL_K4me2_0620	SH_Hs_HL_K4me2_0620	K562_K4me2_CnT_2	CUT&Tag for K4me2 in K562 1:60 in K562 cells at home	CUT&TAG-direct	antibody:H3K4me2 Epicypher cat# 13-0027; cell type:K562 human immortalised myelogenous leukemia cell line	Homo sapiens	CUTnTag-direct_v2_Protocols.io.pdf	genomic DNA	N/A
Fig. 2F	1	SH_Hs_K4m2_0726	SH_Hs_K4m2_0726	K562_K4me2_CnT_3	CUT&Tag for K4me2 in K562 cells at home	CUT&TAG-direct	antibody:H3K4me2 Epicypher cat# 13-0027; cell type:K562 human immortalised myelogenous leukemia cell line	Homo sapiens	CUTnTag-direct_v2_Protocols.io.pdf	genomic DNA	N/A
Fig. 4A peaks		SH_Hs_K4m2_0727	SH_Hs_K4m2_0727	K562_K4me2_CnT_4	CUT&Tag for K4me2 in K562 cells at home	CUT&TAG-direct	antibody:H3K4me2 Epicypher cat# 13-0027; cell type:K562 human immortalised myelogenous leukemia cell line	Homo sapiens	CUTnTag-direct_v2_Protocols.io.pdf	genomic DNA	N/A
Fig. S2	6	SH_Hs_K4m2E_K5_0802	SH_Hs_K4m2E_K5_0802	K562_K4me2_CnT_5	CUT&Tag for K4me2 in K562 cells at home	CUT&TAG-direct	antibody:H3K4me2 Epicypher cat# 13-0027; cell type:K562 human immortalised myelogenous leukemia cell line	Homo sapiens	CUTnTag-direct_v2_Protocols.io.pdf	genomic DNA	N/A
Fig. S2	5	SH_Hs_K4m2E_K5A_0802	SH_Hs_K4m2E_K5A_0802	K562_K4me2_CnT_6	CUTAC Removal for K4me2 20 min in K562 cells at home	CUT&TAG-direct	antibody:H3K4me2 Epicypher cat# 13-0027; cell type:K562 human immortalised myelogenous leukemia cell line	Homo sapiens	CUTnTag-direct_v2_Protocols.io.pdf	genomic DNA	N/A
Fig. S3	27	SH_Hs_K5n_K4m2E_0613	SH_Hs_K5n_K4m2E_0613	K562_K4me2_CnT_7	CUT&Tag for K4me2 in K562 cells at home	CUT&TAG-direct	antibody:H3K4me2 Epicypher cat# 13-0027; cell type:K562 human immortalised myelogenous leukemia cell line	Homo sapiens	CUTnTag-direct_v2_Protocols.io.pdf	genomic DNA	N/A
Fig 3B-C	2	SH_Hs_K5n_K4m2E_0615	SH_Hs_K5n_K4m2E_0615	K562_K4me2_CnT_8	CUT&Tag for K4me2 in K562 cells at home	CUT&TAG-direct	antibody:H3K4me2 Epicypher cat# 13-0027; cell type:K562 human immortalised myelogenous leukemia cell line	Homo sapiens	CUTnTag-direct_v2_Protocols.io.pdf	genomic DNA	N/A
Fig. S3	24	SH_Hs_HRT_K4me2E_0627	SH_Hs_HRT_K4me2E_0627	K562_K4me2_CnT_RT	CUT&Tag for K4me2 in K562 22deg in K562 cells at home	CUT&TAG-direct	antibody:H3K4me2 Epicypher cat# 13-0027; cell type:K562 human immortalised myelogenous leukemia cell line	Homo sapiens	CUTnTag-direct_v2_Protocols.io.pdf	genomic DNA	N/A
Fig. 3E	1	SH_Hs_10_K4me2_0620	SH_Hs_10_K4me2_0620	K562_K4me2_dil10	CUTAC Dilution for K4me2 pAG-Tn5 1:20 10 min in K562 cells at home	CUT&TAG-direct	antibody:H3K4me2 Epicypher cat# 13-0027; cell type:K562 human immortalised myelogenous leukemia cell line	Homo sapiens	CUTnTag-direct_v2_Protocols.io.pdf	genomic DNA	N/A
Fig. S3	6	SH_Hs_10L_K4me2_0620	SH_Hs_10L_K4me2_0620	K562_K4me2_dil10L	CUTAC Dilution for K4me2 pAG-Tn5 1:60 10 min in K562 cells at home	CUT&TAG-direct	antibody:H3K4me2 Epicypher cat# 13-0027; cell type:K562 human immortalised myelogenous leukemia cell line	Homo sapiens	CUTnTag-direct_v2_Protocols.io.pdf	genomic DNA	N/A
Fig. S3	14	SH_Hs_RT2h_K4me2E_0627	SH_Hs_RT2h_K4me2E_0627	K562_K4me2_dil120RT	CUTAC Dilution for K4me2 pAG-Tn5 120 min 22deg in K562 cells at home	CUT&TAG-direct	antibody:H3K4me2 Epicypher cat# 13-0027; cell type:K562 human immortalised myelogenous leukemia cell line	Homo sapiens	CUTnTag-direct_v2_Protocols.io.pdf	genomic DNA	N/A
Fig 3B-C	2	SH_Hs_LK5n_K4me2E_0615	SH_Hs_LK5n_K4m2E_0615	K562_K4me2_dil20	CUTAC Dilution for K4me2 60 min in K562 cells at home	CUT&TAG-direct	antibody:H3K4me2 Epicypher cat# 13-0027; cell type:K562 human immortalised myelogenous leukemia cell line	Homo sapiens	CUTnTag-direct_v2_Protocols.io.pdf	genomic DNA	N/A
Fig. S3	17	SH_Hs_RT20_K4me2E_0627	SH_Hs_RT20_K4me2E_0627	K562_K4me2_dil20RT	CUTAC Dilution for K4me2 pAG-Tn5 20 min 22deg in K562 cells at home	CUT&TAG-direct	antibody:H3K4me2 Epicypher cat# 13-0027; cell type:K562 human immortalised myelogenous leukemia cell line	Homo sapiens	CUTnTag-direct_v2_Protocols.io.pdf	genomic DNA	N/A
Fig. S3	7	SH_Hs_30_K4me2_0620	SH_Hs_30_K4me2_0620	K562_K4me2_dil30	CUTAC Dilution for K4me2 pAG-Tn5 1:20 30 min in K562 cells at home	CUT&TAG-direct	antibody:H3K4me2 Epicypher cat# 13-0027; cell type:K562 human immortalised myelogenous leukemia cell line	Homo sapiens	CUTnTag-direct_v2_Protocols.io.pdf	genomic DNA	N/A
Fig. S3	5	SH_Hs_30L_K4me2_0620	SH_Hs_30L_K4me2_0620	K562_K4me2_dil30L	CUTAC Dilution for K4me2 pAG-Tn5 1:60 30 min in K562 cells at home	CUT&TAG-direct	antibody:H3K4me2 Epicypher cat# 13-0027; cell type:K562 human immortalised myelogenous leukemia cell line	Homo sapiens	CUTnTag-direct_v2_Protocols.io.pdf	genomic DNA	N/A
Fig. S3	3	SH_Hs_5_K4me2E_0627	SH_Hs_5_K4me2E_0627	K562_K4me2_dil5	CUTAC Dilution for K4me2 pAG-Tn5 5 min in K562 cells at home	CUT&TAG-direct	antibody:H3K4me2 Epicypher cat# 13-0027; cell type:K562 human immortalised myelogenous leukemia cell line	Homo sapiens	CUTnTag-direct_v2_Protocols.io.pdf	genomic DNA	N/A
Fig. S3	18	SH_Hs_5m_K4m2E_0629	SH_Hs_5m_K4m2E_0629	K562_K4me2_dil5_2	CUTAC Dilution for K4me2 pAG-Tn5 5 min in K562 cells at home	CUT&TAG-direct	antibody:H3K4me2 Epicypher cat# 13-0027; cell type:K562 human immortalised myelogenous leukemia cell line	Homo sapiens	CUTnTag-direct_v2_Protocols.io.pdf	genomic DNA	N/A
Fig. S3	8	SH_Hs_RT5_K4me2E_0627	SH_Hs_RT5_K4me2E_0627	K562_K4me2_dil5RT	CUTAC Dilution for K4me2 pAG-Tn5 5 min 22deg in K562 cells at home	CUT&TAG-direct	antibody:H3K4me2 Epicypher cat# 13-0027; cell type:K562 human immortalised myelogenous leukemia cell line	Homo sapiens	CUTnTag-direct_v2_Protocols.io.pdf	genomic DNA	N/A
Fig. S3	20	SH_Hs_60_K4me2_0622	SH_Hs_60_K4me2_0622	K562_K4me2_dil60_1	CUTAC Dilution for K4me2 pAG-Tn5 1:20 60 min in K562 cells at home	CUT&TAG-direct	antibody:H3K4me2 Epicypher cat# 13-0027; cell type:K562 human immortalised myelogenous leukemia cell line	Homo sapiens	CUTnTag-direct_v2_Protocols.io.pdf	genomic DNA	N/A
Fig. S4A-B	4	SH_Hs_60_K4me2_0620	SH_Hs_60_K4me2_0620	K562_K4me2_dil60_2	CUTAC Dilution for K4me2 pAG-Tn5 1:20 60 min in K562 cells at home	CUT&TAG-direct	antibody:H3K4me2 Epicypher cat# 13-0027; cell type:K562 human immortalised myelogenous leukemia cell line	Homo sapiens	CUTnTag-direct_v2_Protocols.io.pdf	genomic DNA	N/A
Fig. S3	12	SH_Hs_60L_K4me2_0620	SH_Hs_60L_K4me2_0620	K562_K4me2_dil60L	CUTAC Dilution for K4me2 pAG-Tn5 1:60 60 min in K562 cells at home	CUT&TAG-direct	antibody:H3K4me2 Epicypher cat# 13-0027; cell type:K562 human immortalised myelogenous leukemia cell line	Homo sapiens	CUTnTag-direct_v2_Protocols.io.pdf	genomic DNA	N/A
Fig. S3	15	SH_Hs_RT60_2K4me2M_0627	SH_Hs_RT60_2K4me2M_0627	K562_K4me2_dil60RT	CUTAC Dilution for K4me2 pAG-Tn5 60 min 22deg in K562 cells at home	CUT&TAG-direct	antibody:H3K4me2 Millipore cat# 07-030 lot 3229364; cell type:K562 human immortalised myelogenous leukemia cell line	Homo sapiens	CUTnTag-direct_v2_Protocols.io.pdf	genomic DNA	N/A
Fig 3D	3	SH_Hs_K4m2E_60_0809	SH_Hs_K4m2E_60_0809	K562_K4me2_p-w_60	CUTAC Post-wash for K4me2 60 min in K562 cells at home	CUT&TAG-direct	antibody:H3K4me2 Epicypher cat# 13-0027; cell type:K562 human immortalised myelogenous leukemia cell line	Homo sapiens	CUTnTag-direct_v2_Protocols.io.pdf	genomic DNA	N/A
Fig. S3	26	SH_Hs_HRT_K4me2M_0627	SH_Hs_HRT_K4me2M_0627	K562_K4me2M_CnT_RT	CUT&Tag for K4me2 in K562 22deg in K562 cells at home	CUT&TAG-direct	antibody:H3K4me2 Millipore cat# 07-030 lot 3229364; cell type:K562 human immortalised myelogenous leukemia cell line	Homo sapiens	CUTnTag-direct_v2_Protocols.io.pdf	genomic DNA	N/A
Fig. S3	16	SH_Hs_RT2h_2K4me2M_0627	SH_Hs_RT2h_2K4me2M_0627	K562_K4me2M_dil120RT	CUTAC Dilution for K4me2 pAG-Tn5 120 min 22deg in K562 cells at home	CUT&TAG-direct	antibody:H3K4me2 Millipore cat# 07-030 lot 3229364; cell type:K562 human immortalised myelogenous leukemia cell line	Homo sapiens	CUTnTag-direct_v2_Protocols.io.pdf	genomic DNA	N/A
Fig. S3	11	SH_Hs_20_2K4me2M_0627	SH_Hs_20_2K4me2M_0627	K562_K4me2M_dil20	CUTAC Dilution for K4me2 20 min in K562 cells at home	CUT&TAG-direct	antibody:H3K4me2 Millipore cat# 07-030 lot 3229364; cell type:K562 human immortalised myelogenous leukemia cell line	Homo sapiens	CUTnTag-direct_v2_Protocols.io.pdf	genomic DNA	N/A
Fig. S3	9	SH_Hs_5_2K4me2M_0627	SH_Hs_5_2K4me2M_0627	K562_K4me2M_dil5	CUTAC Dilution for K4me2 pAG-Tn5 5 min in K562 cells at home	CUT&TAG-direct	antibody:H3K4me2 Millipore cat# 07-030 lot 3229364; cell type:K562 human immortalised myelogenous leukemia cell line	Homo sapiens	CUTnTag-direct_v2_Protocols.io.pdf	genomic DNA	N/A
Fig. 4D peaks		SH_Hs_K4m3_K5_0802	SH_Hs_K4m3_K5_0802	K562_K4me3_1	CUT&Tag for K4me3 in K562 cells at home	CUT&TAG-direct	antibody:H3K4me3 Active Motif cat# 39159 lot# 22118006; cell type:K562 human immortalised myelogenous leukemia cell line	Homo sapiens	CUTnTag-direct_v2_Protocols.io.pdf	genomic DNA	N/A
Fig. S2	7	SH_Hs_K4m3_K5A_0802	SH_Hs_K4m3_K5A_0802	K562_K4me3_2	CUTAC Removal for K4me3 20 min in K562 cells at home	CUT&TAG-direct	antibody:H3K4me3 Active Motif cat# 39159 lot# 22118006; cell type:K562 human immortalised myelogenous leukemia cell line	Homo sapiens	CUTnTag-direct_v2_Protocols.io.pdf	genomic DNA	N/A
1D		SH_Hs_K4m3_200_0321	SH_Hs_K4m3_200_0321	K562_K4me3_200_home	CUT&Tag for K4me3 in 200 K562 cells at home	CUT&TAG	antibody:H3K4me3 Active Motif cat# 39159 lot# 22118006; cell type:K562 human immortalised myelogenous leukemia cell line	Homo sapiens	CnTathome_Protocols_io.pdf	genomic DNA	N/A
1D		SH_Hs_K4m3_200_0311	SH_Hs_K4m3_200_0311	K562_K4me3_200_lab	CUT&Tag for K4me3 in 200 K562 cells in lab	CUT&TAG	antibody:H3K4me3 Active Motif cat# 39159 lot# 22118006; cell type:K562 human immortalised myelogenous leukemia cell line	Homo sapiens	CnTathome_Protocols_io.pdf	genomic DNA	N/A
1D		SH_Hs_K4m3_20k_0321	SH_Hs_K4m3_20k_0321	K562_K4me3_20k_home	CUT&Tag for K4me3 in 20,000 K562 cells at home	CUT&TAG	antibody:H3K4me3 Active Motif cat# 39159 lot# 22118006; cell type:K562 human immortalised myelogenous leukemia cell line	Homo sapiens	CnTathome_Protocols_io.pdf	genomic DNA	N/A
1D		SH_Hs_K4me3_20k_0311	SH_Hs_K4me3_20k_0311	K562_K4me3_20k_lab	CUT&Tag for K4me3 in 20,000 K562 cells in lab	CUT&TAG	antibody:H3K4me3 Active Motif cat# 39159 lot# 22118006; cell type:K562 human immortalised myelogenous leukemia cell line	Homo sapiens	CnTathome_Protocols_io.pdf	genomic DNA	N/A
1D		SH_Hs_K4m3_2000_0321	SH_Hs_K4m3_2000_0321	K562_K4me3_2k_home	CUT&Tag for K4me3 in 2,000 K562 cells at home	CUT&TAG	antibody:H3K4me3 Active Motif cat# 39159 lot# 22118006; cell type:K562 human immortalised myelogenous leukemia cell line	Homo sapiens	CnTathome_Protocols_io.pdf	genomic DNA	N/A
1D		SH_Hs_K4m3_2000_0311	SH_Hs_K4m3_2000_0311	K562_K4me3_2k_lab	CUT&Tag for K4me3 in 2,000 K562 cells in lab	CUT&TAG	antibody:H3K4me3 Active Motif cat# 39159 lot# 22118006; cell type:K562 human immortalised myelogenous leukemia cell line	Homo sapiens	CnTathome_Protocols_io.pdf	genomic DNA	N/A
Fig 3B-C	1	SH_Hs_K5n_K4m3_0615	SH_Hs_K5n_K4m3_0615	K562_K4me3_3	CUT&Tag for K4me3 in K562 cells at home	CUT&TAG-direct	antibody:H3K4me3 Active Motif cat# 39159 lot# 22118006; cell type:K562 human immortalised myelogenous leukemia cell line	Homo sapiens	CUTnTag-direct_v2_Protocols.io.pdf	genomic DNA	N/A
1D		SH_Hs_K4m3_65_0321	SH_Hs_K4m3_65_0321	K562_K4me3_60_home	CUT&Tag for K4me3 in 60 K562 cells at home	CUT&TAG	antibody:H3K4me3 Active Motif cat# 39159 lot# 22118006; cell type:K562 human immortalised myelogenous leukemia cell line	Homo sapiens	CnTathome_Protocols_io.pdf	genomic DNA	N/A
1D		SH_Hs_K4m3_65_0311	SH_Hs_K4m3_65_0311	K562_K4me3_60_lab	CUT&Tag for K4me3 in 60 K562 cells in lab	CUT&TAG	antibody:H3K4me3 Active Motif cat# 39159 lot# 22118006; cell type:K562 human immortalised myelogenous leukemia cell line	Homo sapiens	CnTathome_Protocols_io.pdf	genomic DNA	N/A
1D		SH_Hs_K4m3_650_0321	SH_Hs_K4m3_650_0321	K562_K4me3_600_home	CUT&Tag for K4me3 in 600 K562 cells at home	CUT&TAG	antibody:H3K4me3 Active Motif cat# 39159 lot# 22118006; cell type:K562 human immortalised myelogenous leukemia cell line	Homo sapiens	CnTathome_Protocols_io.pdf	genomic DNA	N/A
1D		SH_Hs_K4m3_650_0311	SH_Hs_K4m3_650_0311	K562_K4me3_600_lab	CUT&Tag for K4me3 in 600 K562 cells in lab	CUT&TAG	antibody:H3K4me3 Active Motif cat# 39159 lot# 22118006; cell type:K562 human immortalised myelogenous leukemia cell line	Homo sapiens	CnTathome_Protocols_io.pdf	genomic DNA	N/A
1D		SH_Hs_K4m3_65k_0321	SH_Hs_K4m3_65k_0321	K562_K4me3_60k_home	CUT&Tag for K4me3 in 60,000 K562 cells at home	CUT&TAG	antibody:H3K4me3 Active Motif cat# 39159 lot# 22118006; cell type:K562 human immortalised myelogenous leukemia cell line	Homo sapiens	CnTathome_Protocols_io.pdf	genomic DNA	N/A
1D		SH_Hs_K4m3_65k_0311	SH_Hs_K4m3_65k_0311	K562_K4me3_60k_lab	CUT&Tag for K4me3 in 60,000 K562 cells in lab	CUT&TAG	antibody:H3K4me3 Active Motif cat# 39159 lot# 22118006; cell type:K562 human immortalised myelogenous leukemia cell line	Homo sapiens	CnTathome_Protocols_io.pdf	genomic DNA	N/A
1D		SH_Hs_K4m3_6500_0321	SH_Hs_K4m3_6500_0321	K562_K4me3_6k_home	CUT&Tag for K4me3 in 6,000 K562 cells at home	CUT&TAG	antibody:H3K4me3 Active Motif cat# 39159 lot# 22118006; cell type:K562 human immortalised myelogenous leukemia cell line	Homo sapiens	CnTathome_Protocols_io.pdf	genomic DNA	N/A
1D		SH_Hs_K4m3_6500_0311	SH_Hs_K4m3_6500_0311	K562_K4me3_6k_lab	CUT&Tag for K4me3 in 6,000 K562 cells in lab	CUT&TAG	antibody:H3K4me3 Active Motif cat# 39159 lot# 22118006; cell type:K562 human immortalised myelogenous leukemia cell line	Homo sapiens	CnTathome_Protocols_io.pdf	genomic DNA	N/A
Fig 3B-C	1	SH_Hs_LK5n_K4me3_0615	SH_Hs_LK5n_K4me3_0615	K562_K4me3_dil20	CUTAC Dilution for K4me3 60 min in K562 cells at home	CUT&TAG-direct	antibody:H3K4me3 Active Motif cat# 39159 lot# 22118006; cell type:K562 human immortalised myelogenous leukemia cell line	Homo sapiens	CUTnTag-direct_v2_Protocols.io.pdf	genomic DNA	N/A
Fig. S2	18	SH_Hs_K9m3_0801	SH_Hs_K9m3_0801	K562_K9me3	CUT&Tag for K9me3 in K562 cells at home	CUT&TAG-direct	antibody:H3K9me3 Abcam ab8898 lot GR3302452-1; cell type:K562 human immortalised myelogenous leukemia cell line	Homo sapiens	CUTnTag-direct_v2_Protocols.io.pdf	genomic DNA	N/A
Fig. S2	17	SH_Hs_K9m3_10_0801	SH_Hs_K9m3_10_0801	K562_K9me3_rem10	CUTAC Removal for K9me3 20 min in K562 cells at home	CUT&TAG-direct	antibody:H3K9me3 Abcam ab8898 lot GR3302452-1; cell type:K562 human immortalised myelogenous leukemia cell line	Homo sapiens	CUTnTag-direct_v2_Protocols.io.pdf	genomic DNA	N/A
Fig. S2	22	SH_Hs_NPAT_0801	SH_Hs_NPAT_0801	K562_NPAT	CUT&Tag for NPAT in K562 cells at home	CUT&TAG-direct	antibody:Thermo cat# PA566839; cell type:K562 human immortalised myelogenous leukemia cell line	Homo sapiens	CUTnTag-direct_v2_Protocols.io.pdf	genomic DNA	N/A
Fig. S2	21	SH_Hs_NPAT_10_0801	SH_Hs_NPAT_10_0801	K562_NPAT_rem10	CUTAC Removal for NPAT 20 min in K562 cells at home	CUT&TAG-direct	antibody:Thermo cat# PA566839; cell type:K562 human immortalised myelogenous leukemia cell line	Homo sapiens	CUTnTag-direct_v2_Protocols.io.pdf	genomic DNA	N/A
Table 1, Fig 5–figsup1	2	SH_Hs_H1K4me2E_1005	SH_Hs_H1K4me2E_1005	H1_H3K4me2_p-w	CUT&Tag Post-wash for K4me2 60 min in H1 ES cells at home	CUT&TAG-direct	antibody:H3K4me2 Epicypher cat# 13-0027; cell type:H1 human embryonic stem cell line	Homo sapiens	CUTnTag-direct_v2_Protocols.io.pdf	genomic DNA	N/A
Table 1, Fig 5–figsup1	4	SH_Hs_H1K4me2E_con_1005	SH_Hs_H1K4me2E_con_1005	H1_H3K4me2_con_p-w	CUTAC Post-wash for K4me2 20 min in H1 ES cells at home	CUT&TAG-direct	antibody:H3K4me2 Epicypher cat# 13-0027; cell type:H1 human embryonic stem cell line	Homo sapiens	CUTnTag-direct_v2_Protocols.io.pdf	genomic DNA	N/A
Fig. 5–figsup1B	7	SH_Hs_H1K4me2E_dmf_1005	SH_Hs_H1K4me2E_dmf_1005	H1_H3K4me2_dmf_p-w	CUTAC Post-wash for K4me2 20 min dmf in H1 ES cells at home	CUT&TAG-direct	antibody:H3K4me2 Epicypher cat# 13-0027; cell type:H1 human embryonic stem cell line	Homo sapiens	CUTnTag-direct_v2_Protocols.io.pdf	genomic DNA	N/A
Fig. 5–figsup1B	8	SH_Hs_H1K4me2E_dmfRT_1005	SH_Hs_H1K4me2E_dmfRT_1005	H1_H3K4me2_dmfRT_p-w	CUTAC Post-wash for K4me2 20 min dmf RT in H1 ES cells at home	CUT&TAG-direct	antibody:H3K4me2 Epicypher cat# 13-0027; cell type:H1 human embryonic stem cell line	Homo sapiens	CUTnTag-direct_v2_Protocols.io.pdf	genomic DNA	N/A
Fig. 5–figsup1B	9	SH_Hs_H1K4me2E_hdRT_1005	SH_Hs_H1K4me2E_hdRT_1005	H1_H3K4me2_hdRT_p-w	CUTAC Post-wash for K4me2 20 min hex dmf 22deg in H1 ES cells at home	CUT&TAG-direct	antibody:H3K4me2 Epicypher cat# 13-0027; cell type:H1 human embryonic stem cell line	Homo sapiens	CUTnTag-direct_v2_Protocols.io.pdf	genomic DNA	N/A
Fig. 5–figsup1B	6	SH_Hs_H1K4me2E_hex_1005	SH_Hs_H1K4me2E_hex_1005	H1_H3K4me2_hex_p-w	CUTAC Post-wash for K4me2 20 min hex in H1 ES cells at home	CUT&TAG-direct	antibody:H3K4me2 Epicypher cat# 13-0027; cell type:H1 human embryonic stem cell line	Homo sapiens	CUTnTag-direct_v2_Protocols.io.pdf	genomic DNA	N/A
Fig. 5–figsup1B	5	SH_Hs_H1K4me2E_RT_1005	SH_Hs_H1K4me2E_RT_1005	H1_H3K4me2_RT_p-w	CUTAC Post-wash for K4me2 20 min 22deg in H1 ES cells at home	CUT&TAG-direct	antibody:H3K4me2 Epicypher cat# 13-0027; cell type:H1 human embryonic stem cell line	Homo sapiens	CUTnTag-direct_v2_Protocols.io.pdf	genomic DNA	N/A
Fig. 3–figsup1E-F	1	SH_Hs_K4me2E_1004	SH_Hs_K4me2E_1004	K562_H3K4me2_p-w_1	CUTAC Post-wash for K4me2 in K562 cells at home	CUT&TAG-direct	antibody:H3K4me2 Epicypher cat# 13-0027; cell type:K562 human immortalised myelogenous leukemia cell line	Homo sapiens	CUTnTag-direct_v2_Protocols.io.pdf	genomic DNA	N/A
Fig. 3–figsup1E-F	2	SH_Hs_K4me2E_con_1004	SH_Hs_K4me2E_con_1004	K562_H3K4me2_con_p-w_1	CUTAC Post-wash for K4me2 20 min in K562cells at home	CUT&TAG-direct	antibody:H3K4me2 Epicypher cat# 13-0027; cell type:K562 human immortalised myelogenous leukemia cell line	Homo sapiens	CUTnTag-direct_v2_Protocols.io.pdf	genomic DNA	N/A
Fig. 3–figsup1E-F	6	SH_Hs_K4me2E_dmf_1004	SH_Hs_K4me2E_dmf_1004	K562_H3K4me2_dmf_p-w	CUTAC Post-wash for K4me2 20 min dmf in K562 cells at home	CUT&TAG-direct	antibody:H3K4me2 Epicypher cat# 13-0027; cell type:K562 human immortalised myelogenous leukemia cell line	Homo sapiens	CUTnTag-direct_v2_Protocols.io.pdf	genomic DNA	N/A
Fig. 3–figsup1E-F	4	SH_Hs_K4me2E_hex_1004	SH_Hs_K4me2E_hex_1004	K562_H3K4me2_hex_p-w	CUTAC Post-wash for K4me2 20 min hex in K562 cells at home	CUT&TAG-direct	antibody:H3K4me2 Epicypher cat# 13-0027; cell type:K562 human immortalised myelogenous leukemia cell line	Homo sapiens	CUTnTag-direct_v2_Protocols.io.pdf	genomic DNA	N/A
Fig. 3–figsup1E-F	5	SH_Hs_K4me2E_hexRT_1004	SH_Hs_K4me2E_hexRT_1004	K562_H3K4me2_hexRT_p-w	CUTAC Post-wash for K4me2 20 min hex 22deg in K562 cells at home	CUT&TAG-direct	antibody:H3K4me2 Epicypher cat# 13-0027; cell type:K562 human immortalised myelogenous leukemia cell line	Homo sapiens	CUTnTag-direct_v2_Protocols.io.pdf	genomic DNA	N/A
Fig. 3–figsup1E-F	3	SH_Hs_K4me2E_RT_1004	SH_Hs_K4me2E_RT_1004	K562_H3K4me2_RT_p-w	CUTAC Post-wash for K4me2 20 min 22deg in K562cells at home	CUT&TAG-direct	antibody:H3K4me2 Epicypher cat# 13-0027; cell type:K562 human immortalised myelogenous leukemia cell line	Homo sapiens	CUTnTag-direct_v2_Protocols.io.pdf	genomic DNA	N/A
Fig. 3–figsup1E-F	7	SH_Hs_K4me2M_1004	SH_Hs_K4me2M_1004	K562_H3K4me2_p-w_2	CUTAC Post-wash for K4me2 in K562 cells at home	CUT&TAG-direct	antibody:H3K4me2 Epicypher cat# 13-0027; cell type:K562 human immortalised myelogenous leukemia cell line	Homo sapiens	CUTnTag-direct_v2_Protocols.io.pdf	genomic DNA	N/A
Fig. 3–figsup1E-F	8	SH_Hs_K4me2M_con_1004	SH_Hs_K4me2M_con_1004	K562_H3K4me2_con_p-w_2	CUTAC Post-wash for K4me2 20 min in K562 cells at home	CUT&TAG-direct	antibody:H3K4me2 Epicypher cat# 13-0027; cell type:K562 human immortalised myelogenous leukemia cell line	Homo sapiens	CUTnTag-direct_v2_Protocols.io.pdf	genomic DNA	N/A
Fig. 6–figsup1	1	SH_Hs_K4me3_1005	SH_Hs_K4me3_1005	K562_H3K4me3_CnT_4	CUT&Tag K4me3 in K562 cells at home	CUT&TAG-direct	antibody:H3K4me3 Active Motif cat# 39159 lot# 22118006; cell type:K562 human immortalised myelogenous leukemia cell line	Homo sapiens	CUTnTag-direct_v2_Protocols.io.pdf	genomic DNA	N/A
Fig. 4F, Fig. 6–figsup1	2	SH_Hs_K4me3_con_1005	SH_Hs_K4me3_con_1005	K562_H3K4me3_con_p-w	CUTAC Post-wash for K4me3 20 min in K562 cells at home	CUT&TAG-direct	antibody:H3K4me3 Active Motif cat# 39159 lot# 22118006; cell type:K562 human immortalised myelogenous leukemia cell line	Homo sapiens	CUTnTag-direct_v2_Protocols.io.pdf	genomic DNA	N/A
Fig. 4F	8	SH_Hs_K4me3_dmf1005	SH_Hs_K4me3_dmf1005	K562_H3K4me3_dmf_p-w	CUTAC Post-wash for K4me3 20 min dmf in K562 cells at home	CUT&TAG-direct	antibody:H3K4me3 Active Motif cat# 39159 lot# 22118006; cell type:K562 human immortalised myelogenous leukemia cell line	Homo sapiens	CUTnTag-direct_v2_Protocols.io.pdf	genomic DNA	N/A
Fig. 4F	7	SH_Hs_K4me3_hex1005	SH_Hs_K4me3_hex1005	K562_H3K4me3_hex_p-w	CUTAC Post-wash for K4me3 20 min hex in K562 cells at home	CUT&TAG-direct	antibody:H3K4me3 Active Motif cat# 39159 lot# 22118006; cell type:K562 human immortalised myelogenous leukemia cell line	Homo sapiens	CUTnTag-direct_v2_Protocols.io.pdf	genomic DNA	N/A

## Sheet: Other database files
Figure	Panel or track	Sample name	GEO, SRA or ENCODE #
1C	1	K562_H3K4me3_ENCODE_ChIP-seq	GSM788088
1D	1	K562_H3K27me3_ENCODE_ChIP-seq	GSM733680
1D	2	K562_H3K27me3_60k-cells	GSM3536511
1D	5	K562_H3K27me3_20k-cells	GSM3536508
1D	8	K562_H3K27me3_6k-cells	GSM3536513
1D	12	K562_H3K27me3_2k-cells	GSM3536509
1D	16	K562_H3K27me3_600-cells	GSM3536510
1D	19	K562_H3K27me3_200-cells	GSM3536507
1D	23	K562_H3K27me3_60-cells	GSM3536512
4A	1	Omni-ATAC	SRA572103
4A	2	Fast-ATAC	SRA572103
4A	3	ATAC_ENCODE	ENCSR868FGK
4B	1,2,3	Omni-ATAC	SRA572103
4B	3	ATAC_ENCODE	ENCSR868FGK
4C	1	Omni-ATAC	SRA572103
4C	2	Fast-ATAC	SRA572103
4C	3	ATAC_ENCODE	ENCSR868FGK
4D	1	Omni-ATAC	SRA572103
4D	2	Fast-ATAC	SRA572103
4D	3	ATAC_ENCODE	ENCSR868FGK
4E	2	Fast-ATAC	SRA572103
4E	1	Omni-ATAC	SRA572103
4E	3	ATAC_ENCODE	ENCSR868FGK
4F	9	Omni-ATAC	SRA572103
4F	10	ATAC_ENCODE	ENCSR868FGK
4F	11	Fast-ATAC	SRA572103
5A-C		Omni-ATAC	SRA572103
5A-C		Fast-ATAC	SRA572103
5A-C		ATAC_ENCODE	ENCSR868FGK
5B		ATAC_GSM4083680	SRR10137241
5B		ATAC_GSM3452726	SRR8137174
5B		ATAC_GSM4190694	SRR10528685
5B		ATAC_GSM4005278	SRR9894938
5B		ATAC_GSM4130894	SRR10311800
6A-C		Omni-ATAC	SRA572103
6B		K562_PolSer5P	GSM3536522
6B		K562 cell PRO-seq SE76	SRR8137173
Fig. 3–figsup1B,D,F	9	Omni-ATAC	SRA572103
Fig. 3–figsup1B,D,F	10	ATAC_ENCODE	ENCSR868FGK
Fig. 3–figsup1B,D,F	11	Fast-ATAC	SRA572103
Fig. 3–figsup2	1	Fast-ATAC	SRA572103
Fig. 3–figsup3	2	Omni-ATAC	SRA572103
Fig. 3–figsup3	1	Fast-ATAC	SRA572103
Fig. 3–figsup3	2	ATAC_ENCODE	ENCSR868FGK
Fig. 3–figsup3	3	Omni-ATAC	SRA572103
Fig. 3–figsup4B	1	Omni-ATAC	SRA572103
Fig. 3–figsup4B	2	Fast-ATAC	SRA572103
Fig. 3–figsup4B	3	ATAC_ENCODE	ENCSR868FGK
Fig. 4–figsup1	1	Omni-ATAC	SRA572103
Fig. 4–figsup2	3	Omni-ATAC	SRA572103
Fig. 4–figsup2	4	Fast-ATAC	SRA572103
Fig. 5–figsup1A	3	Omni-ATAC	SRA572103
Fig. 5–figsup1A	4	ATAC_ENCODE	ENCSR868FGK
Fig. 5–figsup1A	5	ATAC_GSM4083680	SRR10137241
Fig. 5–figsup1A	6	ATAC_GSM3452726	SRR8137174
Fig. 5–figsup1A	7	ATAC_GSM4190694	SRR10528685
Fig. 5–figsup1A	8	Fast-ATAC	SRA572103
Fig. 5–figsup1A	9	ATAC_GSM4005278	SRR9894938
Fig. 5–figsup1A	10	ATAC_GSM4130894	SRR10311800
Fig. 5–figsup1B		ATAC_GSM3677783	SRR8748776
Fig. 5–figsup1B		ATAC_GSM4130883	SRR10311789
Fig. 5–figsup2	15-16	Omni-ATAC	SRA572103
Fig. 5–figsup3	1	Fast-ATAC	SRA572103
Fig. 5–figsup3	2	Omni-ATAC	SRA572103
