# Supplementary figures and images for: Efficient chromatin accessibility mapping in situ by nucleosome-tethered tagmentation
Source: eLife journal article supplement (doi:10.7554/elife.63274), 2020-11-16

A

H3K4me3

CUT&amp;Tag

ENCODE ChIP-seq

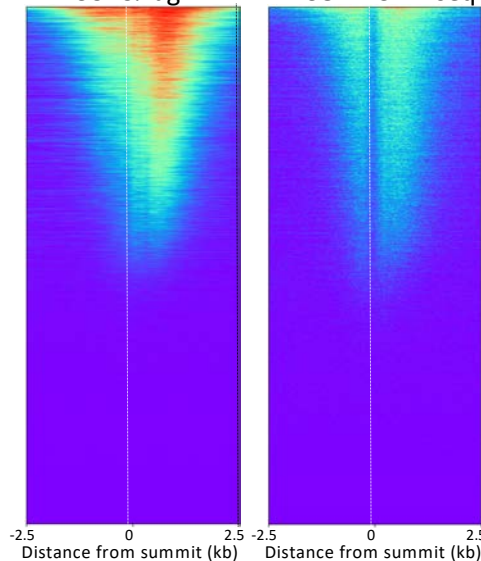

B

H3K4me2

CUT&amp;Tag

ENCODE ChIP-seq

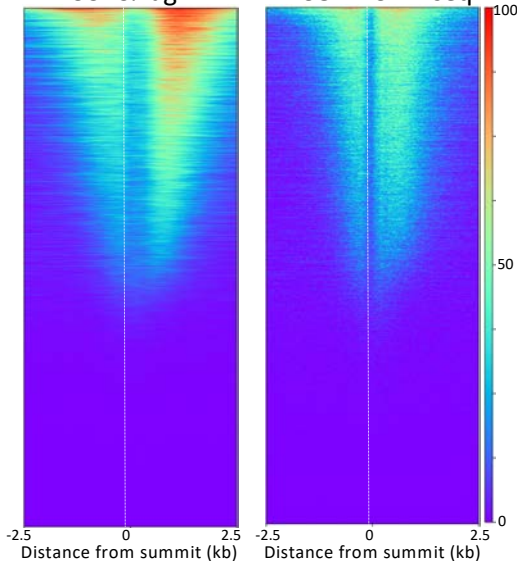

C

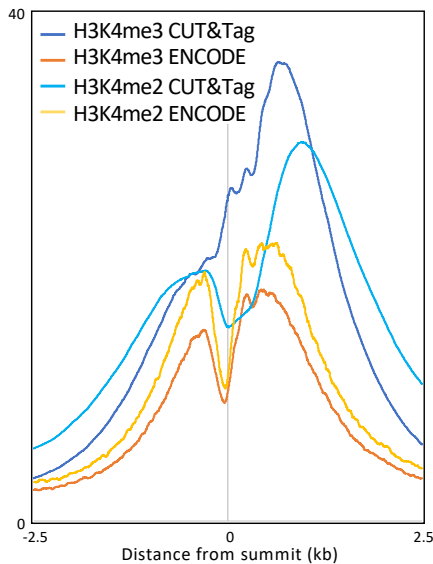

Supplement: supp [file elife-63274-supp-v1.zip]

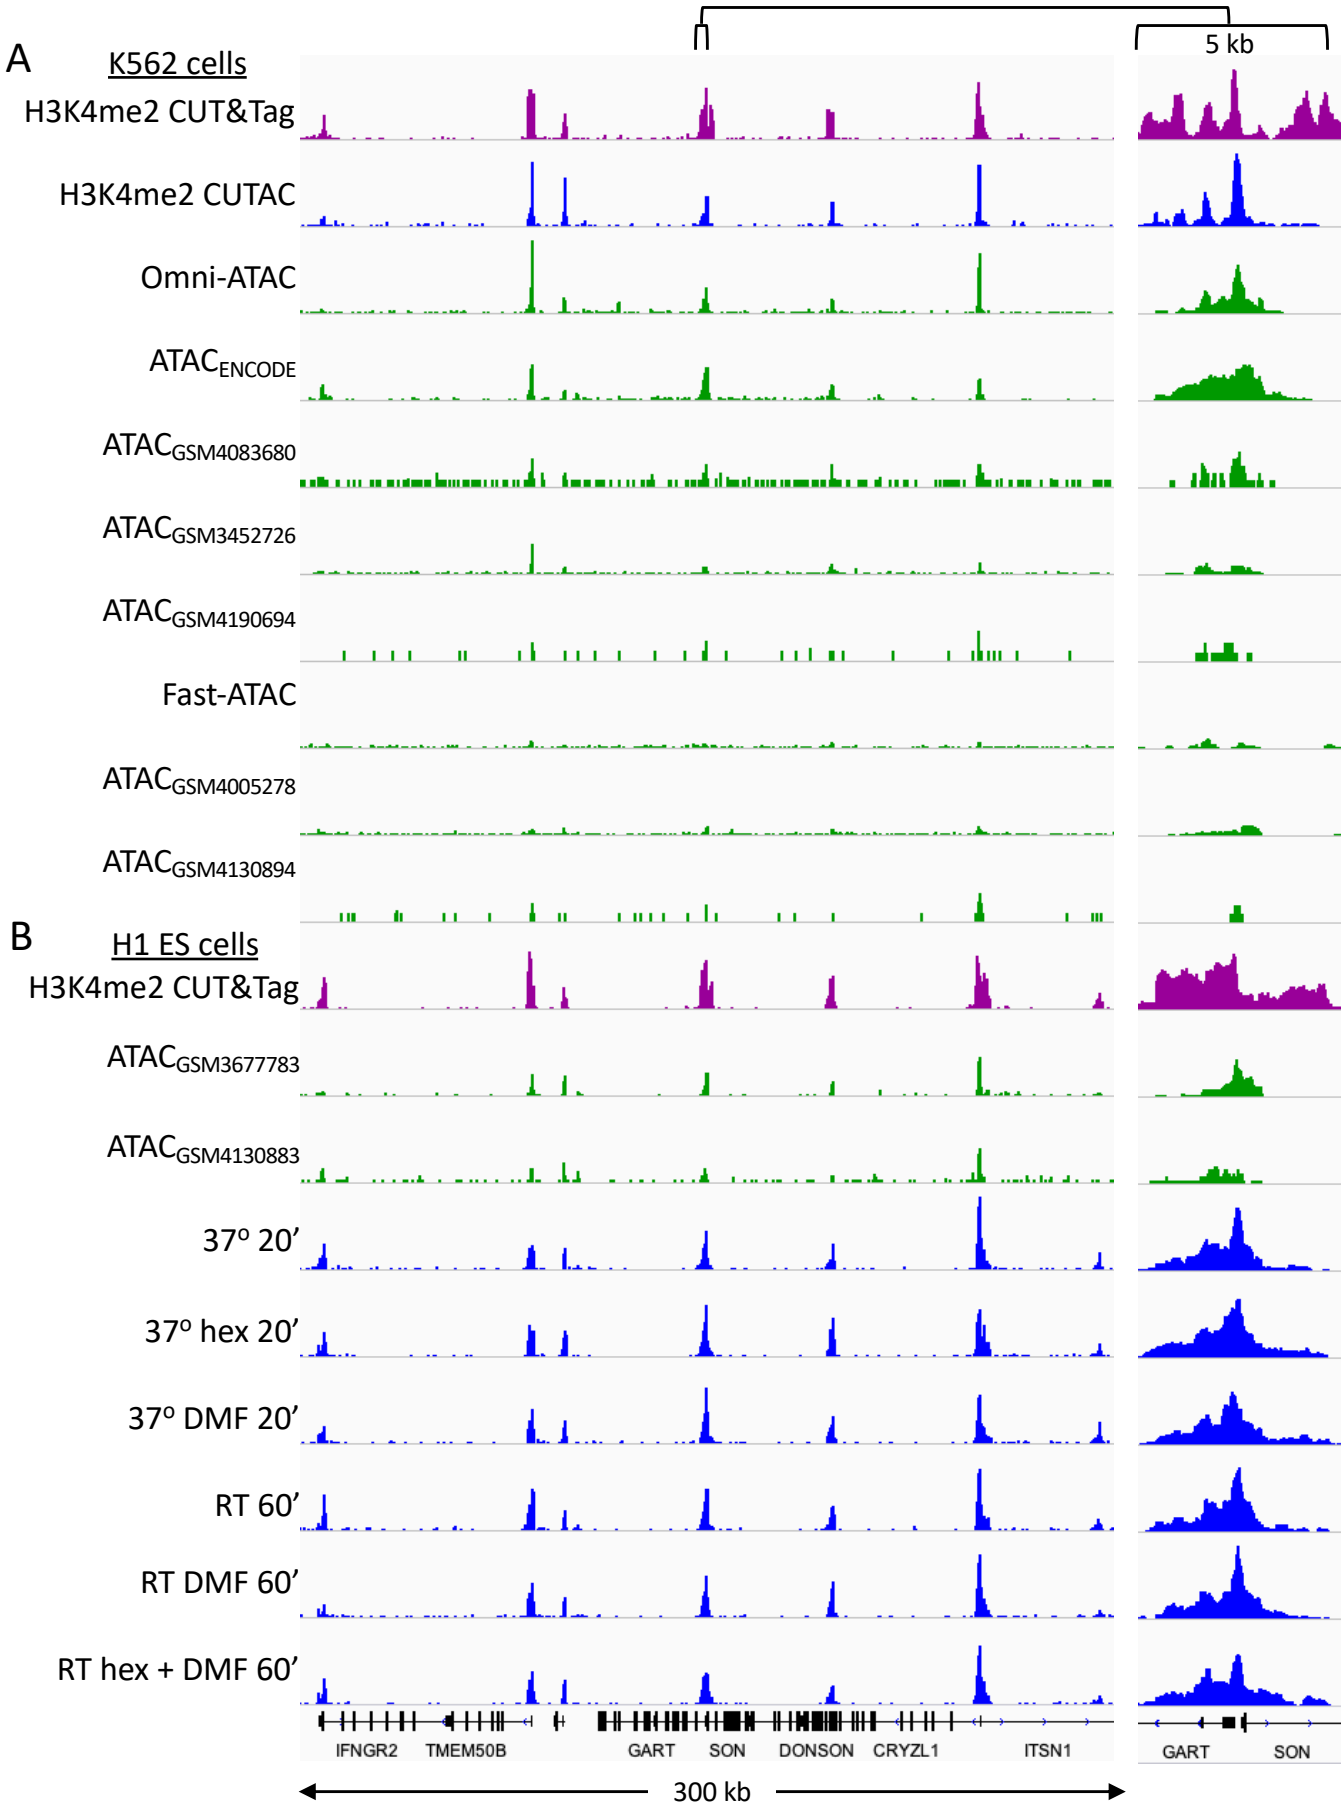

Supplement: supp [file elife-63274-supp-v1.zip]

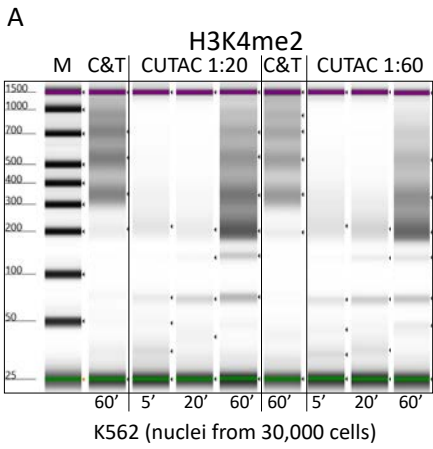

## Dilution protocol

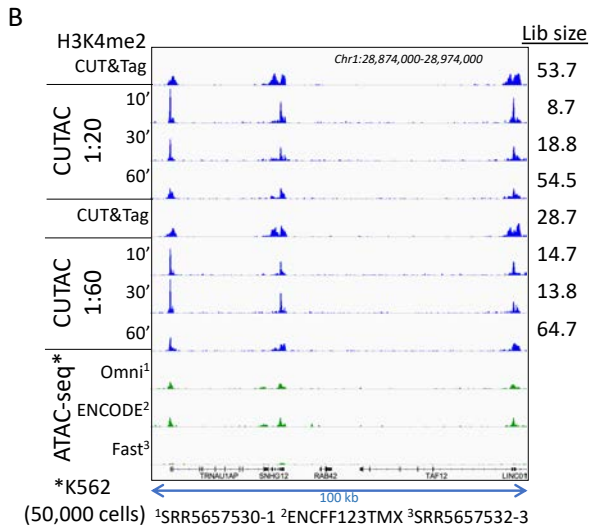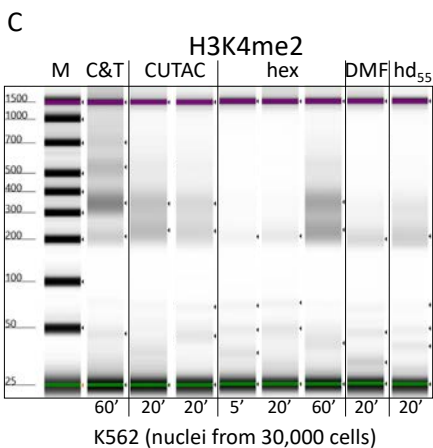

## Removal protocol

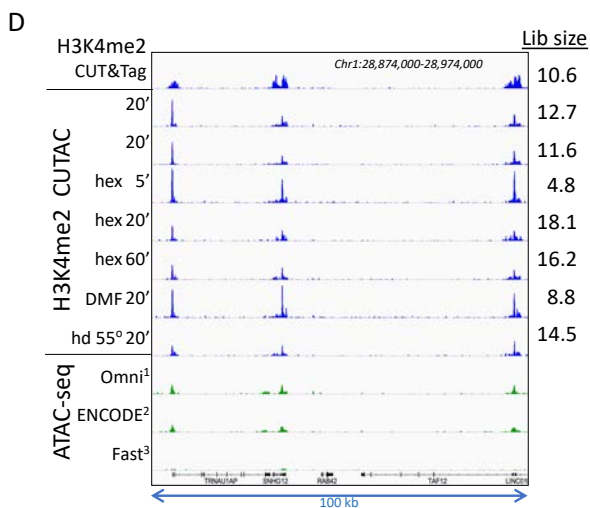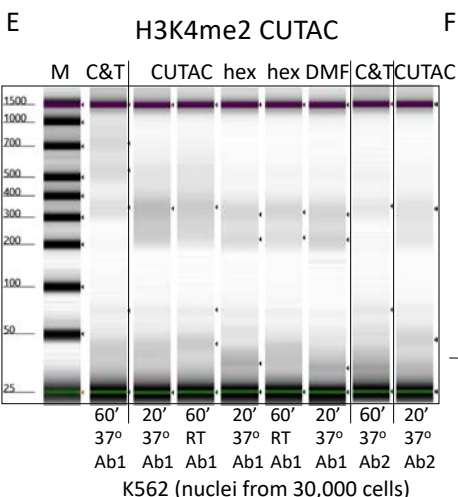

## Post-wash protocol

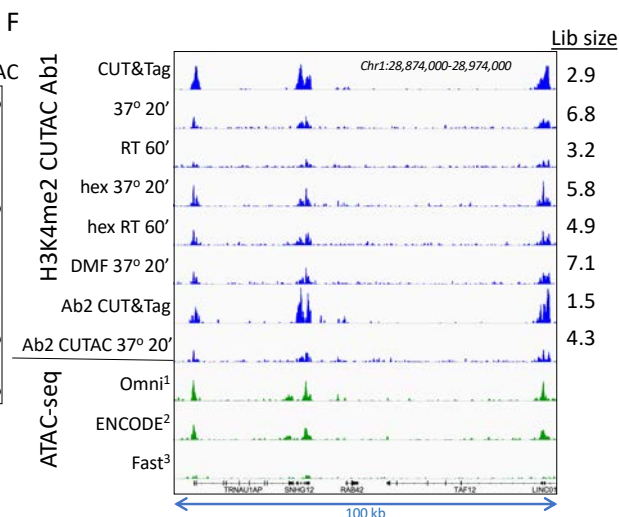

Supplement: supp [file elife-63274-supp-v1.zip]

A

H3K4me3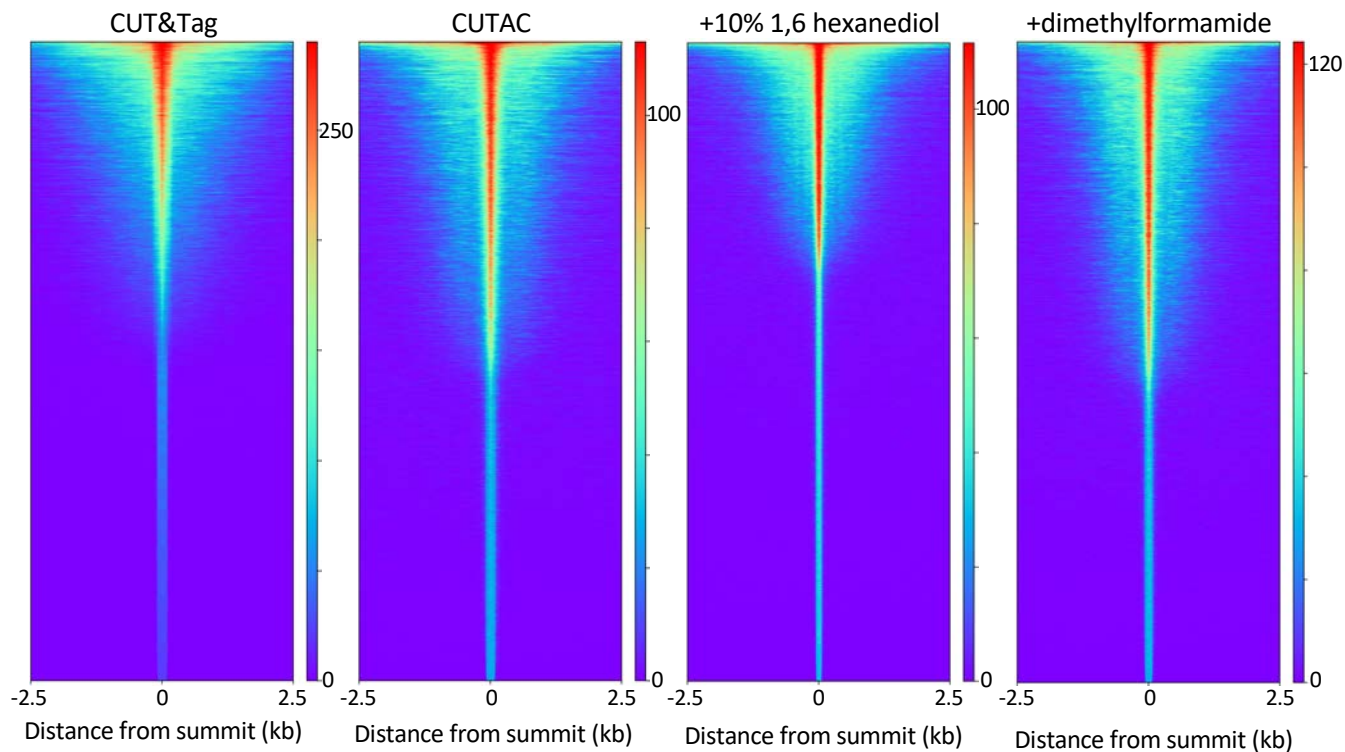

B

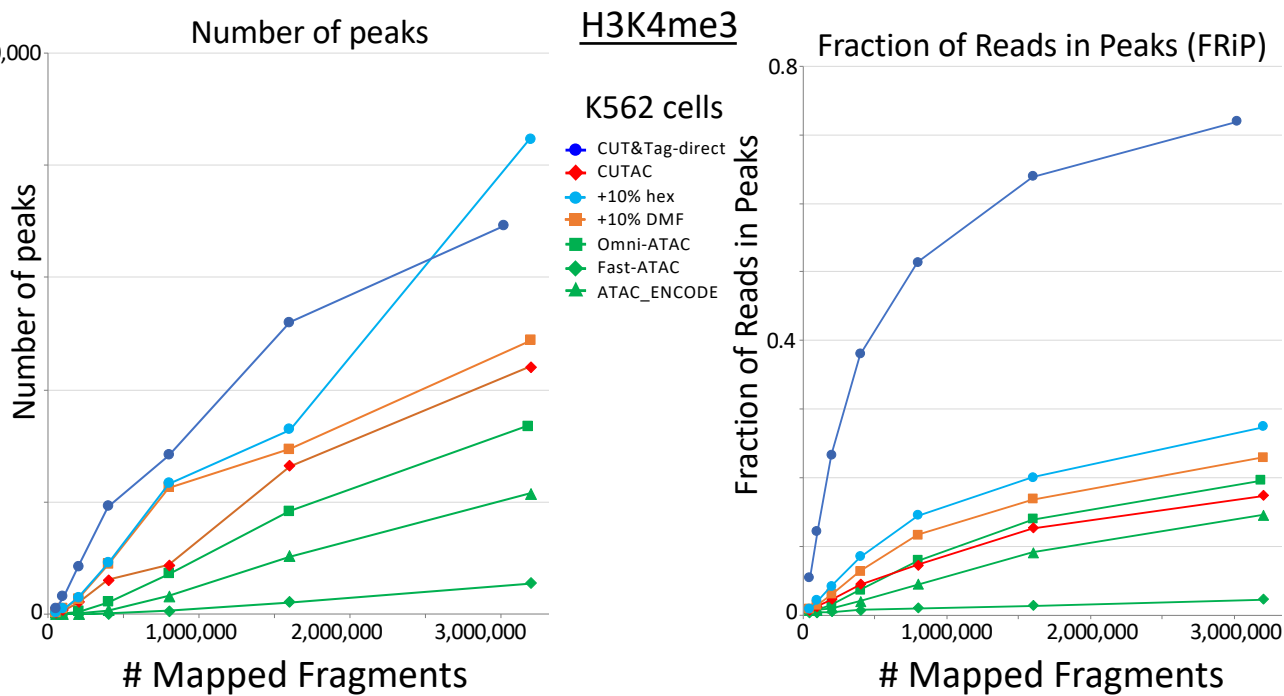

Supplement: supp [file elife-63274-supp-v1.zip]

CUTAC versus Omni-ATAC

CUTAC (Removal protocol 20')

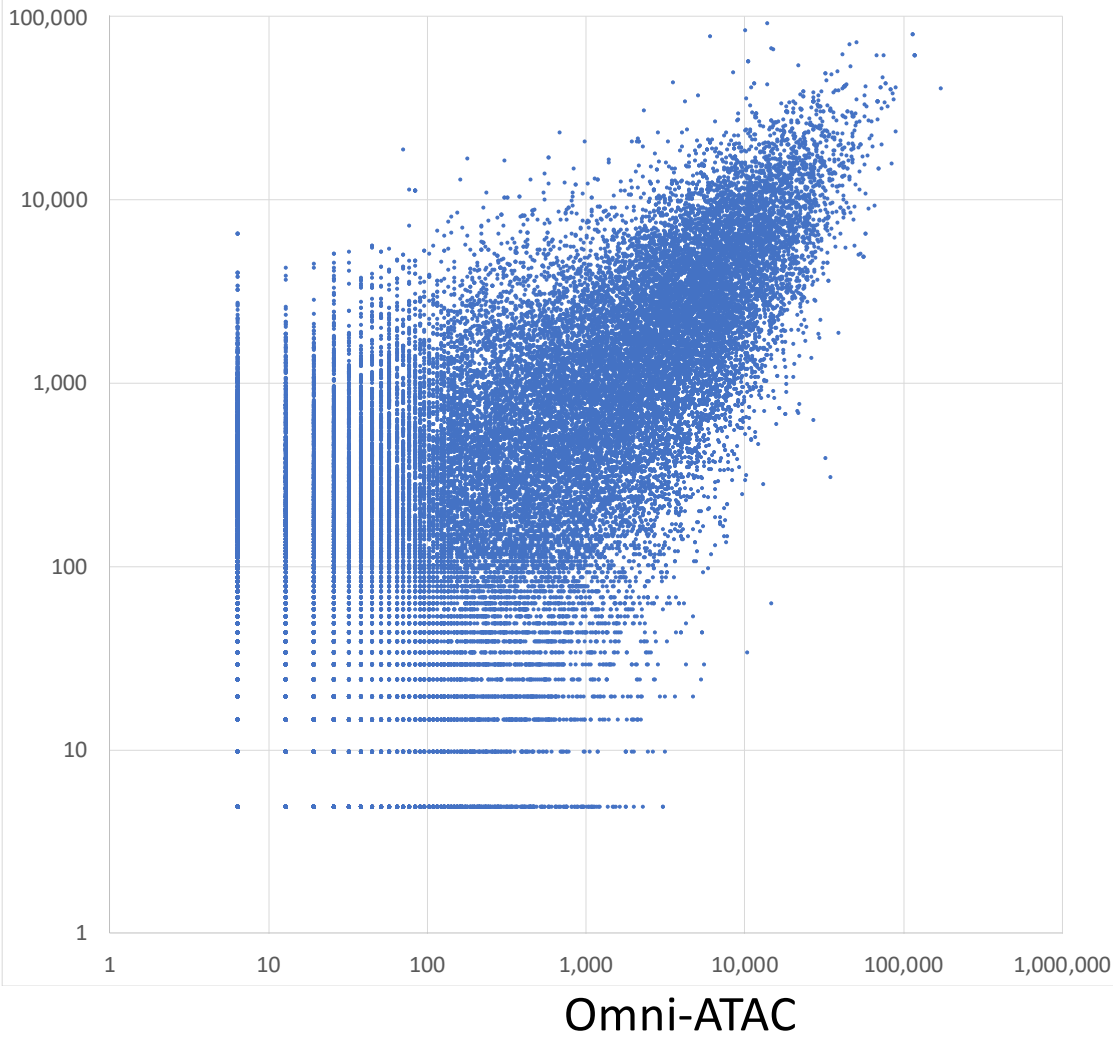

Supplement: supp [file elife-63274-supp-v1.zip]

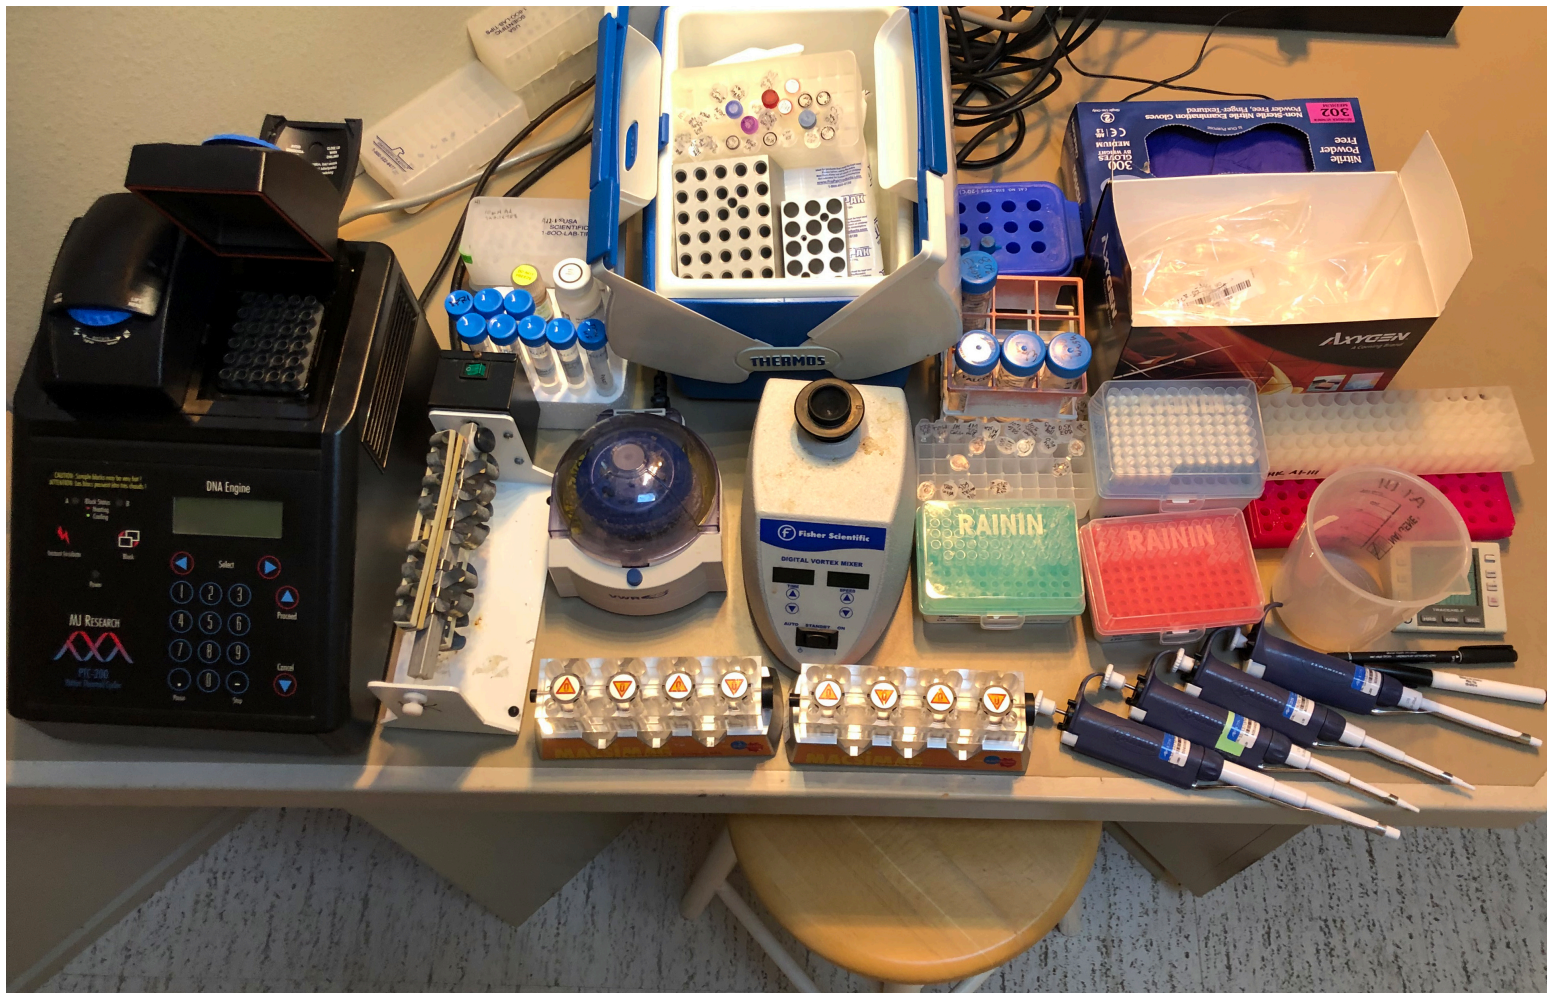

Supplement: supp [file elife-63274-supp-v1.zip]

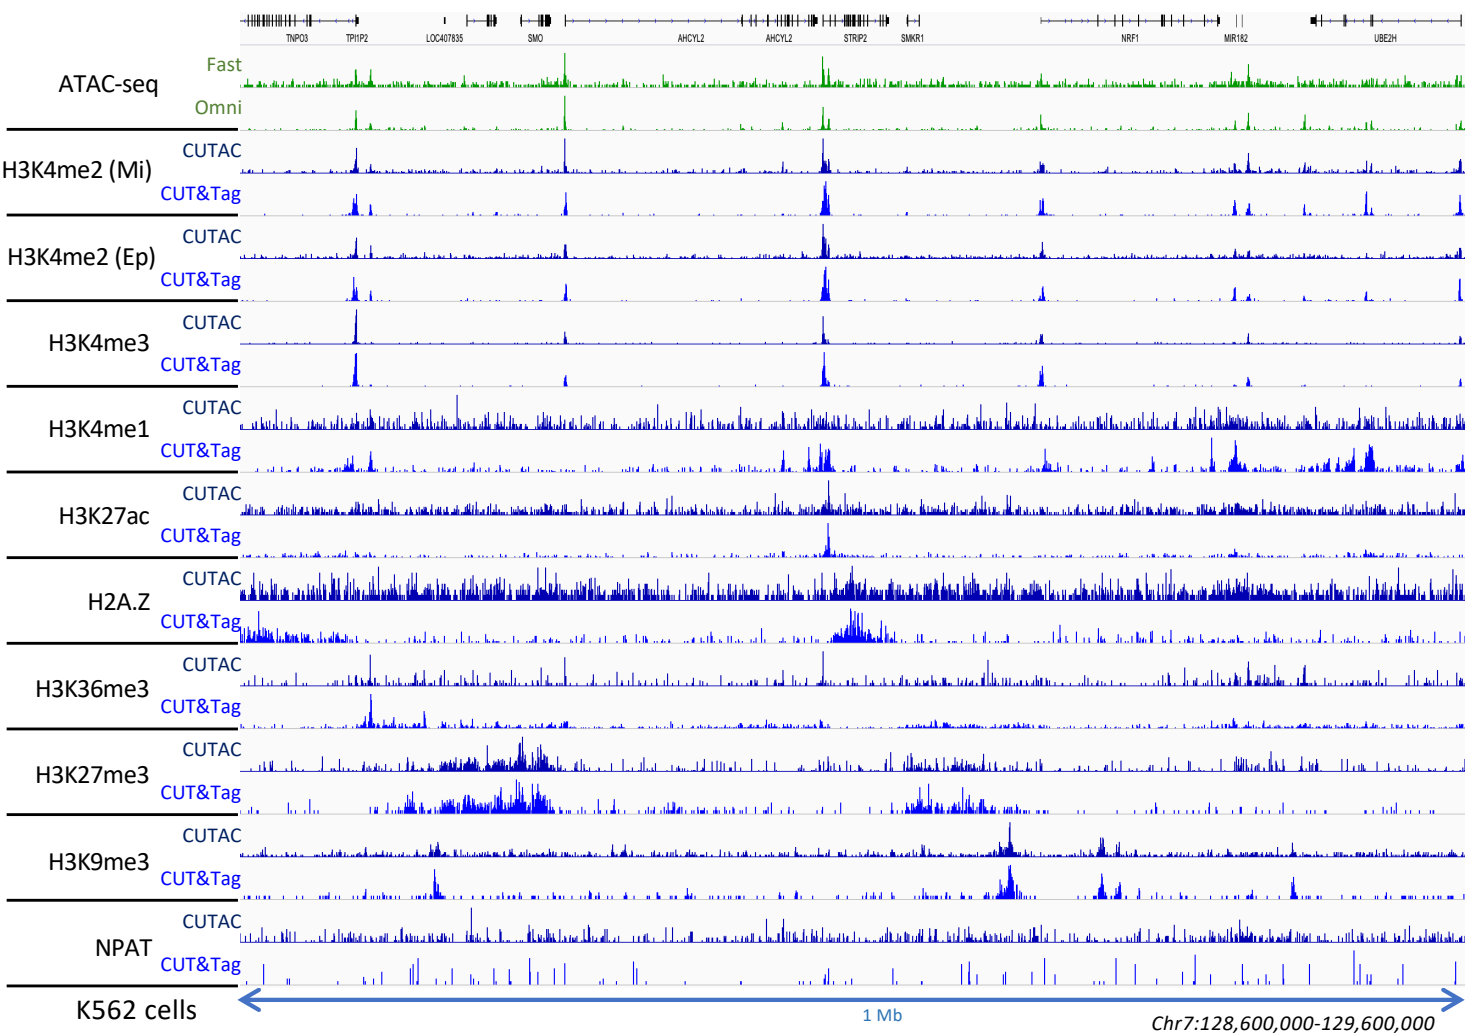

Supplement: supp [file elife-63274-supp-v1.zip]

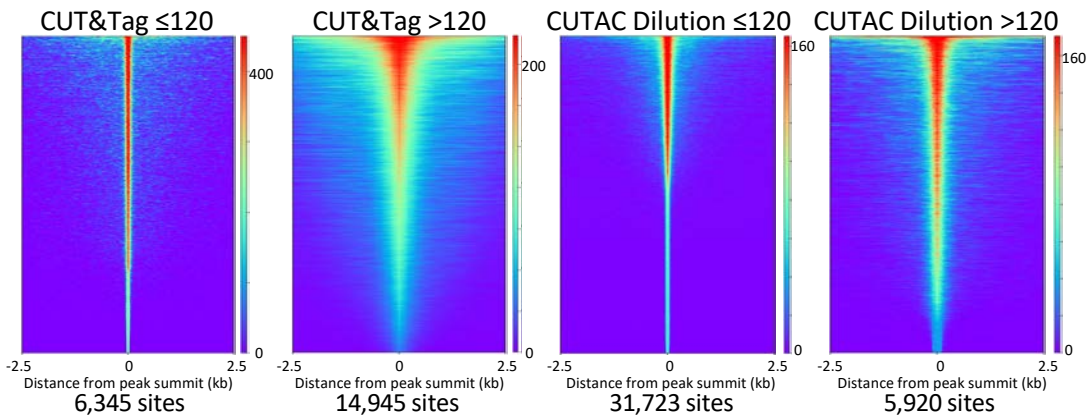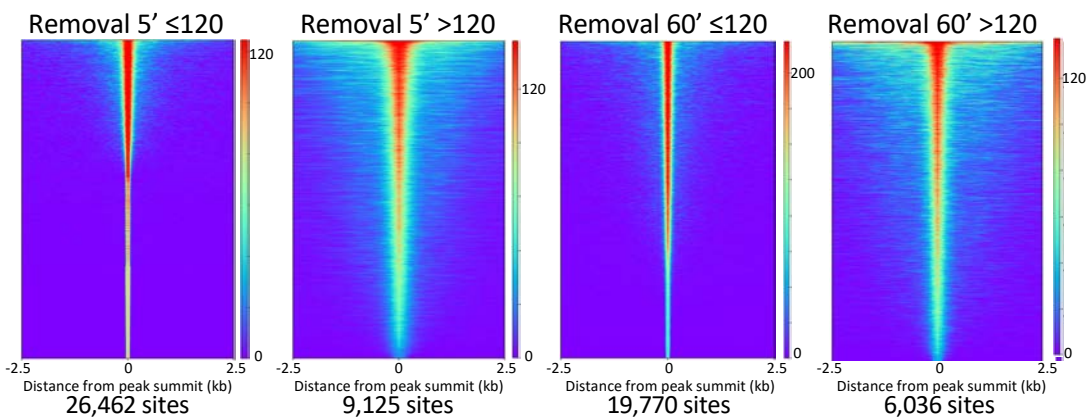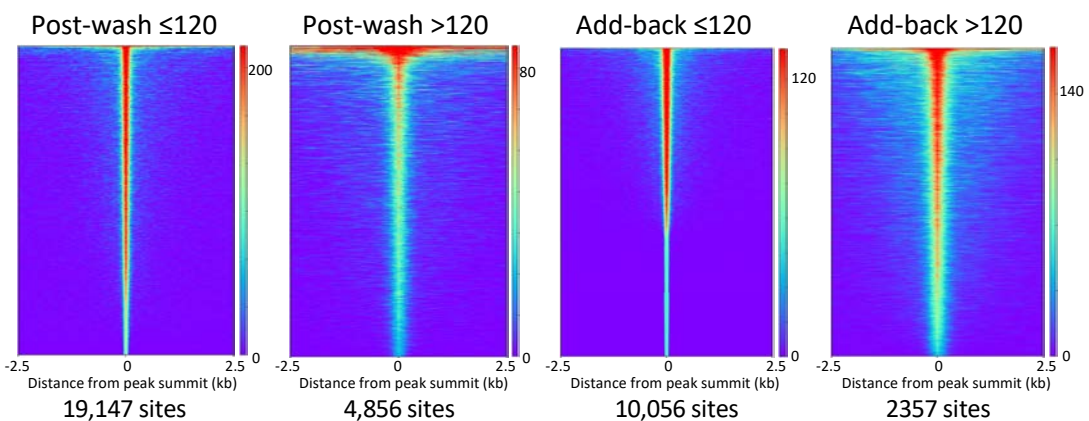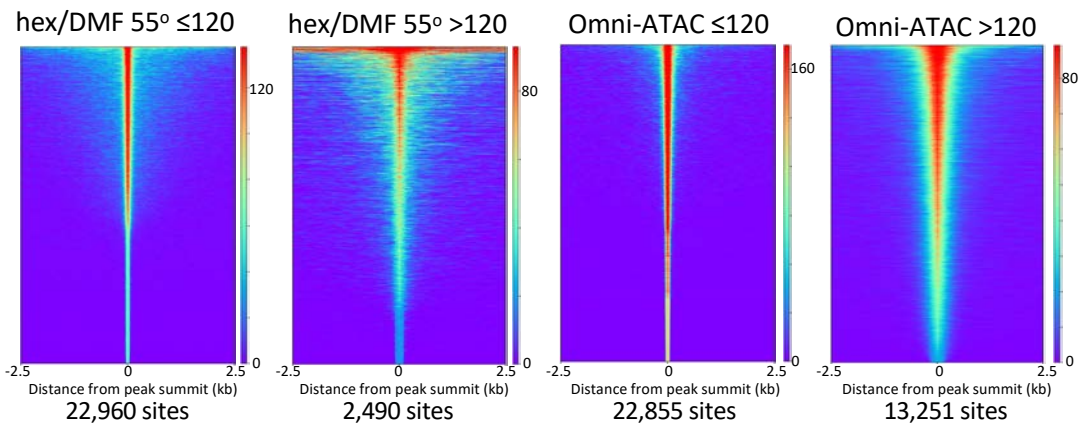

Supplement: supp [file elife-63274-supp-v1.zip]

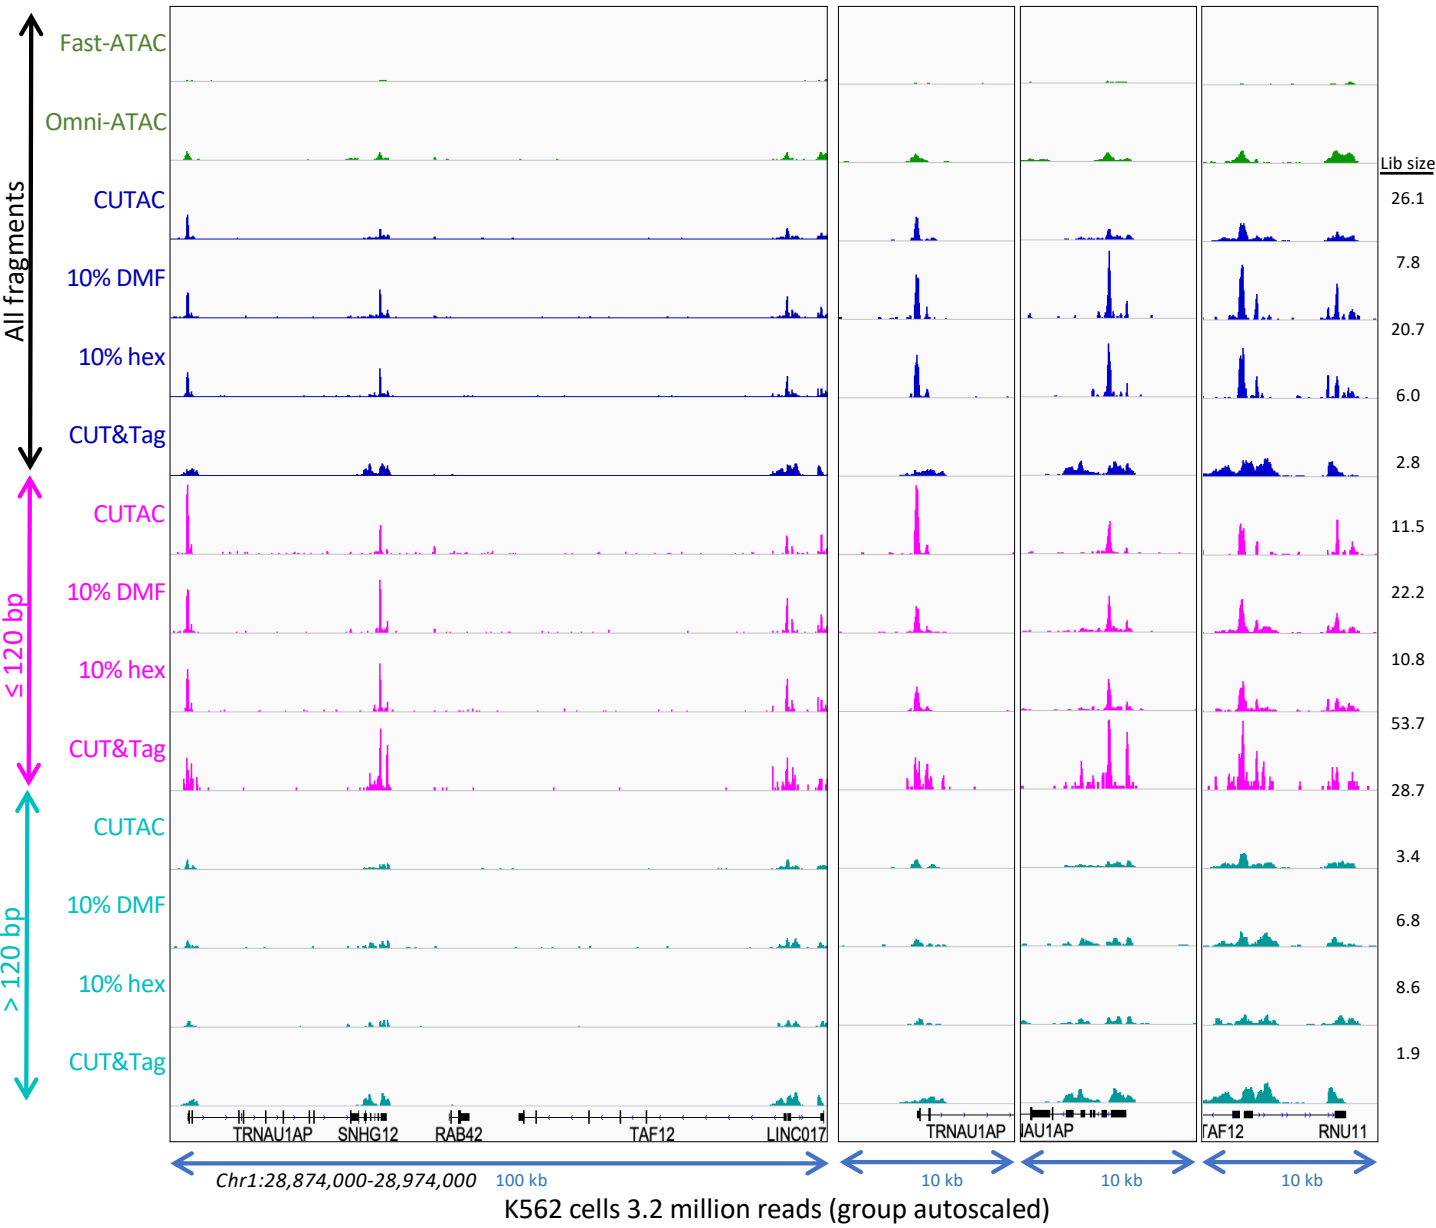

Supplement: supp [file elife-63274-supp-v1.zip]

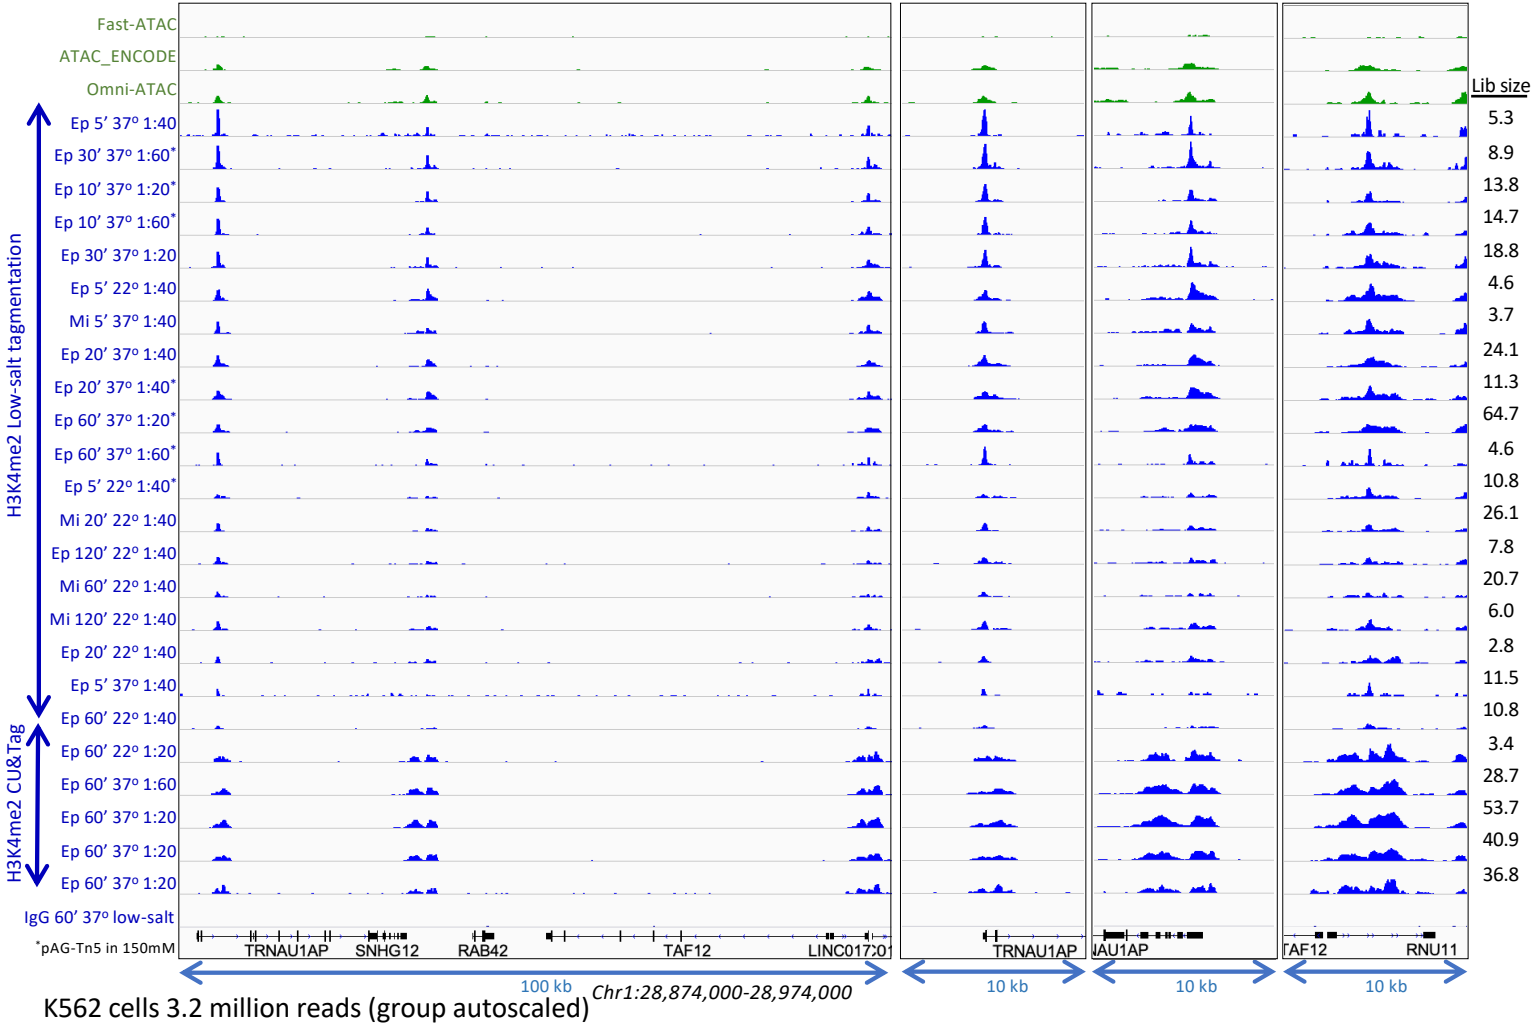

Supplement: supp [file elife-63274-supp-v1.zip]
